1  
2  
3  
4  
5  
6  
7  
8  
9  
10  
11  
12  
13  
14  
15  
16  
17  
18  
19  
20  
21  
22  
23  
24  
25  
26  
27

Using agent-based modeling to compare corrective actions for *Listeria* contamination in produce  
packinghouses

Cecil Barnett-Neefs<sup>1\*</sup>, Genevieve Sullivan<sup>1,3</sup>, Claire Zoellner<sup>2</sup>, Martin Wiedmann<sup>3</sup>, Renata Ivanek<sup>1</sup>

<sup>1</sup> Department of Population Medicine and Diagnostic Sciences, Cornell University, Ithaca, New York, United States of America

<sup>2</sup> iFoodDecisionSciences, Seattle, Washington, United States of America

<sup>3</sup> Department of Food Science, College of Agriculture and Life Sciences, Cornell University, Ithaca, New York, United States of America

\* Corresponding author

E-mail: [cwb96@cornell.edu](mailto:cwb96@cornell.edu) (CBN)

Keywords: decision support tool; simulation; digital twin; computational model; food safety

## 28 Abstract

29 The complex environment of a produce packinghouse can facilitate the spread of pathogens such as  
30 *Listeria monocytogenes* in unexpected ways. This can lead to finished product contamination and  
31 potential foodborne disease cases. There is a need for simulation-based decision support tools that  
32 can test different corrective actions and are able to account for a facility's interior cross-  
33 contamination dynamics. Thus, we developed agent-based models of *Listeria* contamination  
34 dynamics for two produce packinghouse facilities; agents in the models represented equipment  
35 surfaces and employees, and models were parameterized using observations, values from published  
36 literature and expert opinion. Once validated with historical data from *Listeria* environmental  
37 sampling, each model's baseline conditions were investigated and used to determine the  
38 effectiveness of corrective actions in reducing prevalence of agents contaminated with *Listeria* and  
39 concentration of *Listeria* on contaminated agents. Evaluated corrective actions included reducing  
40 incoming *Listeria*, modifying cleaning and sanitation strategies, and reducing transmission pathways,  
41 and combinations thereof. Analysis of *Listeria* contamination predictions revealed differences  
42 between the facilities despite their functional similarities, highlighting that one-size-fits-all  
43 approaches may not always be the most effective means for selection of corrective actions in fresh  
44 produce packinghouses. Corrective actions targeting *Listeria* introduced in the facility on raw  
45 materials, implementing risk-based cleaning and sanitation, and modifying equipment connectivity  
46 were shown to be most effective in reducing *Listeria* contamination prevalence. Overall, our results  
47 suggest that a well-designed cleaning and sanitation schedule, coupled with good manufacturing  
48 practices can be effective in controlling contamination, even if incoming *Listeria* spp. on raw  
49 materials cannot be reduced. The presence of water within specific areas was also shown to  
50 influence corrective action performance. Our findings support that agent-based models can serve as  
51 effective decision support tools in identifying *Listeria*-specific vulnerabilities within individual  
52 packinghouses and hence may help reduce risks of food contamination and potential human  
53 exposure.

## 54 Introduction

55 *Listeria monocytogenes* is an environmentally widespread, Gram-positive bacterium known for its  
56 ability to grow at refrigeration temperatures (1) and persist in food industry equipment due to the  
57 presence of harborage sites and conditions favoring replication of the bacteria (2). Symptoms of *L.*  
58 *monocytogenes* infection can either manifest in the form of relatively lesser signs that include  
59 nausea, vomiting, fever and diarrhea, and more severe ones including abortion, meningitis,  
60 encephalitis, septicemia and death (1). Though only possessing an incidence rate between 0.1 to 10  
61 cases per 1 million people per year depending on the specific country (3), listeriosis has a case-  
62 fatality rate between 20-30% (4), making it a priority in food safety. Within a produce packinghouse  
63 facility, introduction of *L. monocytogenes* on incoming raw produce is only one of the contamination  
64 routes that needs to be addressed, as re-contamination is possible further along production lines  
65 due to the presence of harborage sites within facilities (5). Alternative introduction routes into a

66 facility can include entries via regular staff or equipment movement, or unexpected occurrences  
67 (i.e., random events), such as roof leakage due to extreme weather or during specialized equipment  
68 repairs. The interplay between product, equipment surfaces, water and employees presents a  
69 complicated web of interactions, allowing pathogens like *L. monocytogenes* to spread beyond its  
70 initial introduction site to elsewhere within a facility (6). Challenges associated with control of *L.*  
71 *monocytogenes* are further compounded in fresh and ready-to-eat (RTE) foods that do not undergo  
72 a kill-step, such as fresh and fresh-cut produce. To combat the risk of contamination, facilities can  
73 employ environmental monitoring programs (EMPs) to locate pathogen sources, determine  
74 pathogen spread throughout the facility, and verify which control strategies are most effective.  
75 EMPs involve the routine collection of sponge and swab samples of strategically selected surfaces  
76 within a facility and testing them for *Listeria* spp. as an indicator for conditions that will facilitate *L.*  
77 *monocytogenes* contamination. EMP results play an important role in identifying and implementing  
78 control strategies such as cleaning and sanitation programs and hygienic zoning (7), which helps  
79 restrict pathogen movement.

80 A data scarcity due to limited testing as part of a facility's EMP or low prevalence of *Listeria* spp.  
81 positive samples detected as part of the EMP can be supplemented by *in silico* tools for more  
82 quantitative analysis. Furthermore, a digital decision support tool can assist when determining which  
83 corrective actions to pursue within a facility. Due to the structurally complex nature of these  
84 facilities, an agent-based model (ABM) is well-suited to this task thanks to its inherent specialization  
85 in modelling the interactions of heterogeneous and autonomous "agents" representing the  
86 components of the system under study. Simulating a facility *in silico* can be used for a number of  
87 objectives, such as better understanding of pathogen movement, interpreting results of EMPs, and  
88 evaluating interventions or capital improvements in the facility. One such tool is "Environmental  
89 monitoring with an Agent-Based Model of *Listeria*" (EnABLE) (8), which has already been shown to  
90 allow for analysis of *Listeria* spp. transmission in the slicing and packaging room of a smoked seafood  
91 facility. EnABLE's flexible systems not only allow for the establishment of a model replica

92 (sometimes referred to as a “digital twin”) of a real food production environment, but the rapid  
93 manipulation of any number of model parameters or agent-specific values as well. This inherent  
94 modularity can be an incredibly powerful asset in the development and evaluation of different  
95 corrective actions. Moreover, the establishment of a model aids in identifying targeted interventions  
96 that can be specifically applied to higher risk areas of a facility to mitigate contamination. Thus, the  
97 objective of this study was twofold: (i) to construct and validate ABMs for two produce  
98 packinghouses using historical sampling data and (ii) use these validated ABMs to quantify the  
99 effectiveness of facility-wide and site-specific corrective actions in reducing *Listeria* spp.  
100 contamination in wet and dry areas of the packinghouses.

## 101 **Methods**

102 Data from two produce packinghouse facilities were used to create an ABM for each facility (models  
103 “Facility A” and “Facility B”). ABMs were constructed in NetLogo 6.2.0 (9) following the general  
104 structure of the EnABLE model developed by Zoellner et al. (8). The models were run with one-hour  
105 time steps for a period of two virtual weeks, with the first week allowing *Listeria* to potentially  
106 become introduced and spread in a facility and simulated environmental monitoring (EM) being  
107 performed in the second week for model validation. For corrective action scenarios, each corrective  
108 action was started from the beginning of the simulation and ran for the entire two weeks. For both  
109 facilities, an ABM was constructed of the main room where packing operations were performed.  
110 While the two packinghouse facilities have variations in layout and size, both facilities can be broken  
111 down into similar production steps as briefly summarized: produce is brought into the facility via  
112 crates carried by forklifts and loaded into a flume system. Once loaded, raw produce is then  
113 transferred to a cleaning area for culling and waxing. Produce is then sorted according to size and  
114 appearance and is directed accordingly to either a reject area or the appropriate hand-packing area  
115 (trays and bags in Facility A; only trays in Facility B). Production as well as cleaning and sanitation  
116 shifts were modeled based on information provided by the facilities, with Facility A performing  
117 weekly cleaning and sanitation separately on two separate days, and Facility B performing daily

118 cleaning and sanitation on each workday as well as extended cleaning and sanitation on Saturday.  
119 Both facilities operated on a single shift during workdays (Monday-Friday) with a half hour break in  
120 the middle of the shift.

121

## 122 **Model Construction & Specifications**

123 Each model had two types of agents: equipment and employees. Agents' attributes included the  
124 following fixed characteristics:

- 125 (i) Position (defined by x and y coordinates to represent position in 2D plane)
- 126 (ii) Distance from floor (i.e., "height" in cm, used to calculate interaction order for agents  
127 sharing the same position)
- 128 (iii) Zone category as per proximity to food products (Zone 1: Food-Contact Surfaces (FCS);  
129 Zone 2: Non-Food-Contact Surfaces (NFCS) in close proximity to food and FCS; Zone 3:  
130 NFCS not in close proximity to food or FCS (10))
- 131 (iv) Cleanability, that classified each agent as either (i) cleanable (i.e., any *Listeria* present on  
132 an agent could be removed from the agent during a routine cleaning step) or (ii)  
133 uncleanable (i.e., an agent that due to its design cannot be effectively cleaned during  
134 routine cleaning and thus remains contaminated once *Listeria* spreads on it)
- 135 (v) Cleaning frequency
- 136 (vi) Surface area (cm<sup>2</sup>)

137 Additionally, each agent had a number of time-varying attributes to track:

- 138 (i) *Listeria* quantity (both in terms of the absolute number of CFU and concentration per  
139 surface area (in CFU/cm<sup>2</sup>) on an agent)
- 140 (ii) Frequency of contamination from specific sources over the course of the simulation: (a)  
141 raw incoming food material, (b) random introduction occurrences that could take place  
142 anywhere in the facility, or (c) "Zone 4" (7) introduction (i.e., introduction from areas

143 outside the packing room), which had a more localized effect near actively used  
144 doorways

145 (iii) Agent water level (consisting of three levels: 1: no water; 2: damp to the touch; 3: visible  
146 water on agent)

147 (iv) Niche formations over the course of the simulation (defined as *Listeria* spreading onto  
148 an “uncleanable” agent) or temporary niche formations (defined a contamination of an  
149 otherwise “cleanable” agent that remained contaminated after routine cleaning) and  
150 how frequently these occur

151 (v) Sampling over the course of the simulation (if the agent has been sampled by the  
152 simulated EMP)

153 Table 1 provides a summary of the modeled agents and their characteristics. Agents were grouped  
154 based on their location in the production area (Loading, Cleaning, Sorting, Reject, Bag Packing, Tray  
155 Packing, and an Other group that included a collection of agents not fitting elsewhere, such as  
156 quality control workstations and computer workstations) and by presence of water within the facility  
157 area: “wet” (Loading and Cleaning) and “dry” (Sorting, Bag/Tray Packing, Reject and Other).

158 Following the establishment of the agent list, the contact structure among agents was created by  
159 assigning (i) directed and (ii) undirected links. The presence of connections allowed for transfer of  
160 *Listeria* from one agent to another, depending on link's directionality. Directed links represented  
161 one-way connections (termed "contact-links", consisting of "out-directed-links" on the sending  
162 agents and "in-directed-links" on the receiving agents). These directed links provided opportunities  
163 for *Listeria* transfer in a single direction (with agents sending *Listeria* performing “transfer”, and  
164 agents receiving performing “reception”), such as transfer belts and rollers. Undirected links (termed  
165 "proximity-links") represented repeated contact between two agents, transferring contamination  
166 with a certain frequency and regardless of direction. The models were constructed using  
167 observations from in-person visits to the modeled facilities by authors C.W.B.-N. and G.S. to conduct  
168 behavioral mapping of number and function of workers (11) and to determine layout, key surfaces,

169 water and traffic patterns, and connection pathways (Fig 1). The specifics of produce commodities  
170 packed in the two packinghouses and the locations of packinghouses cannot be provided; this was a  
171 condition for gaining access into the facilities and their data.

172

173 Figure\_1.tiff

174 **Fig 1. NetLogo views of Facilities A (upper panel) and B (lower panel) illustrating positions of and**  
175 **connections among agents and presence of water at a point in time during production.** Circles,  
176 triangles and pentagons represent equipment surfaces in zones 1, 2 and 3, respectively; agent water  
177 level is denoted by shape color darkness and is independent from floor conditions; employees and  
178 forklifts are denoted by specific icons (people and cars respectively); arrows represent the direction  
179 of directed agent links and lines without arrows represent undirected links; blue shaded areas  
180 represent water presence on the floor (darker colors representing puddles and lighter colors  
181 representing damp areas); brown patches denote wall-floor-junctures; grey patches denote doors,  
182 with dark grey patches being points of Zone 4 introduction; empty space is denoted by white  
183 patches; inactive space not represented by the model is denoted by black.

184

185 A baseline map in the form of text files was first constructed using numerical representation to  
186 establish size and grid scale for floor patches, as well as the location of structural components (wall-  
187 floor-junctures, open floor, ceiling, and doors). The surface area per patch was 2,500 cm<sup>2</sup>, with  
188 Facility A consisting of 109 x 88 patches (9,592) and Facility B consisting of 130 x 56 patches (7,020).  
189 Additional maps were then created to represent water level (i.e., none, low, medium, and high) and  
190 traffic level (i.e., none, vehicle, low, medium, and high) on the floor for different phases of facility  
191 operation. A weekly schedule was also established in the form of a 7x24 csv file for each hour in a  
192 week, with each cell detailing the current event for a specific hour (“empty”: no activity; “pre-op”:  
193 pre-operations inspection with minimal staff; “production”: standard operations with full staffing  
194 and activity; “clean”: “Cleaning Only”/ “Cleaning & Sanitation” operations to remove *Listeria* from  
195 equipment) (Tables S1-S5 in S1 File). The schedule was used not only to determine which traffic and  
196 water maps to load, but also defined the presence/absence of specific agents (employees and  
197 forklifts), as well as *Listeria* introduction processes over time.

198 **Table 1. Agent characteristics by zone of agent-based models (Facilities A and B) representing two**  
 199 **modeled packinghouses.**

|                                      | Facility A                     |                            |                          | Facility B                |                            |                          |                         |                           |
|--------------------------------------|--------------------------------|----------------------------|--------------------------|---------------------------|----------------------------|--------------------------|-------------------------|---------------------------|
|                                      | Zone 1 <sup>a</sup>            | Zone 2                     | Zone 3                   | Employees <sup>b</sup>    | Zone 1 <sup>a</sup>        | Zone 2                   | Zone 3                  | Employees <sup>b</sup>    |
| Number of Agents                     | 57                             | 68                         | 63                       | 36                        | 74                         | 122                      | 16                      | 13                        |
| Distance from floor (m)              | 0.90 [0.00, 2.02] <sup>c</sup> | 1.00 [0.00, 2.00]          | 0.00 [0.00, 1.20]        | 1.20 [0.88, 2.05]         | 1.0 [0.05, 1.80]           | 0.71 [0.00, 1.59]        | 0.0 [0.00, 1.15]        | 1.20 [1.20, 2.50]         |
| Surface area (cm <sup>2</sup> )      | 340.0 [240.0, 187785.8]        | 27,500.0 [145.4, 150995.2] | 3,178.5 [340.0, 10259.7] | 340.0 [340.0, 340.0]      | 11,250.0 [625.0, 214468.8] | 2,500.0 [101.3, 43062.5] | 2,725.0 [40.0, 93281.3] | 340.0 [340.0, 340.0]      |
| Number of out-directed links         | 0.0 [0.0, 3.0]                 | 0.0 [0.0, 1.0]             | 0.0 [0.0, 0.0]           | 0.0 [0.0, 2.0]            | 1.0 [0.0, 3.0]             | 0.0 [0.0, 1.0]           | 0.0 [0.0, 0.1]          | 1.0 [1.0, 2.0]            |
| Number of in-directed links          | 0.0 [0.0, 2.0]                 | 0.5 [0.0, 1.0]             | 0.0 [0.0, 0.0]           | 0.0 [0.0, 1.0]            | 1.0 [0.0, 1.0]             | 0.0 [0.0, 1.0]           | 0.0 [0.0, 2.5]          | 1.0 [1.0, 1.0]            |
| Number of undirected links           | 1.0 [0.0, 5.0]                 | 1.0 [0.0, 5.0]             | 1.0 [0.0, 2.0]           | 3.0 [0.0, 5.0]            | 0.0 [0.0, 3.0]             | 0.0 [0.0, 3.0]           | 1.0 [0.0, 5.2]          | 1.0 [0.0, 1.0]            |
| Number (%) uncleanable               | 10 (11%)                       | 20 (29%)                   | 22 (35%)                 | 0 (0%)                    | 6 (8%)                     | 94 (77%)                 | 6 (38%)                 | 0 (0%)                    |
| Equipment/Employee Cleaning Schedule | Weekly <sup>d</sup>            | Weekly <sup>d</sup>        | Weekly <sup>d</sup>      | Upon leaving <sup>e</sup> | Weekdays <sup>f</sup>      | Weekdays <sup>f</sup>    | Weekdays <sup>f</sup>   | Upon leaving <sup>e</sup> |

200 <sup>a</sup>Zone 1 agents and the summary of their attributes do not include employees. <sup>b</sup>Values listed  
 201 specifically refer to a pair of human hands. <sup>c</sup>Values are given as median [5th-95th percentile] unless  
 202 otherwise stated. <sup>d</sup>“Cleaning Only”: Weekly (Saturday); “Cleaning & Sanitation”: Weekly (Monday).  
 203 <sup>e</sup>All *Listeria* removed when employees leave production floor (Modeled are employees leaving the  
 204 production floor for break and at the end of the shift). <sup>f</sup>Cleaning & Sanitation: Weekdays (Monday-  
 205 Friday).

206

207 Finally, input parameters (as either fixed values or probability distributions) were established from  
 208 observations and information in the literature to describe *Listeria* growth, transmission, and  
 209 reduction (Table 2; Tables S6-S9 in S1 File). Data not available in literature sources was acquired  
 210 from a web-based survey with industry and academic experts that was performed by Sullivan et al.  
 211 (12) to specifically collect data needed for development of ABMs for fresh produce facilities. Briefly,  
 212 this expert opinion survey was completed by six individuals (four from academia and two from  
 213 produce industry backgrounds) with expertise on *Listeria* in food facilities. Each question addressed  
 214 a specific parameter; survey results were summarized as a median, minimum, and maximum, which



215 were used to parameterize Pert distributions for each parameter alongside a suitable peakedness  
216 parameter (Table 2). For each distribution used, its mean and 5<sup>th</sup>-95<sup>th</sup> percentiles were then  
217 calculated to provide summary information. Expert elicitation for the purpose of developing a novel  
218 modeling framework is considered beneficial because it permits rapid evaluation of the system and  
219 parameter uncertainty, and thus it allows prioritization of future data collection based on the results  
220 of sensitivity analysis (13). For model parameters represented as probability distributions, the  
221 parameter values across iterations were controlled by a global random seed independent from the  
222 rest of the model to ensure a repeatable stream of values was chosen from the distribution between  
223 simulations of modeled scenarios. Each iteration within a scenario was also controlled with a local  
224 random seed to further ensure repeatability during simulations.

225 To determine the degree of reduction in *Listeria* during cleaning for each agent and the timing of  
226 these operations, each facility was asked to provide information on the cleaning operations they  
227 apply during a regular week. These cleaning activities were modeled as two different levels of  
228 reduction: “Cleaning Only” (average of 0.5 log<sub>10</sub> *Listeria* reduction) and “Cleaning & Sanitation”  
229 (average of 6 log<sub>10</sub> *Listeria* reduction) (14) (for details see S1 File).

230 Several assumptions were made in the model for simplicity: firstly, temperature was uniform and  
231 constant at 12°C within the facility and external weather conditions were not accounted for.  
232 Secondly, *Listeria* on the floor (i.e., patches) was not picked up by agents (i.e., modeled equipment  
233 surfaces and employee hands) due to a lack of data regarding frequency of occurrence and amount  
234 of *Listeria* transferred, as well as a lack of mechanics within the model to adequately judge if an  
235 agent’s surface height is too far from the floor to become directly contaminated from the floor.  
236 Additionally, in the model employees were allocated to their working stations, however, their  
237 movement around the facility was represented through the traffic map and it was assumed they did  
238 not deviate from these patterns. This assumption was not expected to have affected the model  
239 prediction. Employees driving forklifts were not accounted for in the model because they do not

240 contact the floor or agents in the model system. The value of the probability of a cleanable agent  
 241 being properly cleaned either during “Cleaning & Sanitation” ( $\gamma$ ) or “Cleaning Only” ( $\delta$ ) was assumed  
 242 due to lack of information. To determine the potential impact of the assumption we tested smaller  
 243 values of these probabilities but the impact was negligible (Figure S6) and thus the assumed value  
 244 was considered acceptable. Finally, an agent’s cleanability being switched from “uncleanable” to  
 245 “cleanable” in scenarios simulating corrective actions was assumed to either represent (i) the  
 246 inclusion of equipment that was not previously cleaned on a regular basis into facility’s regular  
 247 cleaning and sanitation operations schedule or (ii) modification or replacement of previously difficult  
 248 to clean equipment to allow it to be fully cleaned during regular cleaning operations; thereby, in the  
 249 model a previously uncleanable agent representing such equipment became cleanable.  
 250

251 **Table 2. Baseline model input parameters, description, equation and distribution, summary values**  
 252 **and sources for *Listeria* spp. introduction, growth, transmission, and reduction.**

| Symbol | Description <sup>a</sup>                                                                                                                                       | Equation/Distribution                  | Mean               | 5 <sup>th</sup> -95 <sup>th</sup> Percentile | Reference |
|--------|----------------------------------------------------------------------------------------------------------------------------------------------------------------|----------------------------------------|--------------------|----------------------------------------------|-----------|
| $P_z$  | Probability that <i>Listeria</i> spp. is introduced into the room via objects from Zone 4 per hour                                                             | $10^{\text{Pert}(-2.3,-0.9,-0.6,4.8)}$ | 0.14               | [0.02, 0.36]                                 | (12)      |
| $N_z$  | Amount of <i>Listeria</i> spp. introduced to an agent or patch from Zone 4 (CFU) per occurrence                                                                | $10^{\text{Pert}(0.0,1.9,3.3,4.2)}$    | 156                | [6.04, 618.79]                               | (12)      |
| $R_d$  | Probability of a crate of incoming raw produce containing <i>Listeria</i> -contaminated produce on day d, for d = Monday, Tuesday, Wednesday, Thursday, Friday | $10^{\text{Pert}(-2.3,-0.6,-0.6,5.4)}$ | 0.161 <sup>b</sup> | [5.82E-2, 0.243]                             | (12)      |

|          |                                                                                                                                  |                                                                                                                                                                                         |        |                  |                   |
|----------|----------------------------------------------------------------------------------------------------------------------------------|-----------------------------------------------------------------------------------------------------------------------------------------------------------------------------------------|--------|------------------|-------------------|
| $N_R$    | Concentration of <i>Listeria</i> spp. per gram of contaminated raw produce (CFU/g)                                               | Gamma(0.18,0.425)                                                                                                                                                                       | 0.42   | [8.90E-8, 2.24]  | (15)              |
| $\alpha$ | Proportion of <i>Listeria</i> spp. transferred to a surface upon contact with a contaminated raw produce                         | $10^{\text{Normal}[-0.44,0.4]}$ for $\alpha < 1$ , else $\alpha=1$                                                                                                                      | 0.45   | [0.08, 1.00]     | (16)              |
| $P_r$    | Rate of random event occurrences that introduce <i>Listeria</i> spp. from outside the room per hour                              | $10^{\text{Pert}[-4.3,-0.9,-0.6,4.6]}$                                                                                                                                                  | 0.07   | [4.00E-3, 0.203] | (12)              |
| $N_r$    | Amount of <i>Listeria</i> spp. introduced per random event (CFU)                                                                 | $10^{\text{Pert}(0.2,3.3,3.7,3.3)}$                                                                                                                                                     | 1233   | [42, 3829]       | (12)              |
| $K$      | Environmental carrying capacity of <i>Listeria</i> spp. (CFU/ml)                                                                 | -                                                                                                                                                                                       | 1.00E8 | -                | (14)              |
| GT       | Generation time (hr) of <i>Listeria</i> spp. on environment surfaces at 12 °C                                                    | Uniform(16,217)                                                                                                                                                                         | 116.48 | [26.05, 206.95]  | (17)              |
| $\mu$    | Maximum specific growth rate ( $\text{hr}^{-1}$ ) of <i>Listeria</i> spp. on environment surfaces (12 °C)                        | $\text{Ln}(2)/\text{GT}$                                                                                                                                                                | 0.01   | [0.00, 0.03]     | <i>calculated</i> |
| $P_t$    | Probability that contact on floor from foot and equipment traffic is sufficient to spread <i>Listeria</i> spp. to adjacent patch | Pert(0.03,0.25,0.65,4)                                                                                                                                                                  | 0.28   | [0.10, 0.48]     | (18)              |
| $C_i$    | Contact rate between the contaminated patch and the                                                                              | $C_{\text{veh}}=120/\text{patch}/\text{hr}$<br>$C_{\text{high}}=60/\text{patch}/\text{hr}$<br>$C_{\text{low}}=12/\text{patch}/\text{hr}$<br>$C_{\text{neg}}=0.2/\text{patch}/\text{hr}$ | -      | -                | <i>observed</i>   |

|               |                                                                                                                                                                                                                     |                     |       |                    |                            |
|---------------|---------------------------------------------------------------------------------------------------------------------------------------------------------------------------------------------------------------------|---------------------|-------|--------------------|----------------------------|
|               | adjacent patch given the traffic level $I = \text{veh}$ , <i>high, low, neg<sup>c</sup></i>                                                                                                                         |                     |       |                    |                            |
| $P_w$         | Probability that environmental <i>Listeria</i> spp. is transported to adjacent patches via (visible) water                                                                                                          | Uniform(0.01,0.05)  | 0.03  | [0.01, 0.05]       | (8)                        |
| $\beta$       | Probability of <i>Listeria</i> spp. transmission among patches via traffic and water                                                                                                                                | Uniform(0.0,0.05)   | 0.03  | [3.00E-3, 4.80E-2] | (8)                        |
| $P_f$         | Probability that a contaminated produce or organic debris falls to the floor during any given hour of production                                                                                                    | Uniform(0.01,0.03)  | 0.2   | [1.10E-2, 2.90E-2] | <i>observed</i>            |
| $P_c$         | Probability of a condensation transfer event given <i>Listeria</i> spp. is present                                                                                                                                  | Uniform(0.0,0.02)   | 0.01  | [1.00E-3, 1.90E-2] | <i>observed</i>            |
| $\vartheta_d$ | Log <sub>10</sub> reduction of <i>Listeria</i> spp. from equipment during “Cleaning Only” on day d, for d= <i>Friday</i> within Facility A                                                                          | Pert(-1.5,-0.5,0,4) | -0.58 | [-0.78, -0.37]     | (14)                       |
| $\eta_d$      | Log <sub>10</sub> reduction of <i>Listeria</i> spp. from equipment during “Cleaning & Sanitation” on day d, in Facility A d= <i>Saturday</i> ; in Facility B d= <i>Monday, Tuesday, Wednesday, Thursday, Friday</i> | Pert(-8,-6,-1.5,4)  | -5.58 | [-7.36, -3.47]     | (14)                       |
| $\gamma$      | Probability that a cleanable agent was properly cleaned when                                                                                                                                                        | -                   | 0.99  | -                  | <i>assumed<sup>d</sup></i> |

|             |                                                                                                                                                                     |                                                      |          |          |                             |
|-------------|---------------------------------------------------------------------------------------------------------------------------------------------------------------------|------------------------------------------------------|----------|----------|-----------------------------|
|             | “Cleaning & Sanitation” was performed                                                                                                                               |                                                      |          |          |                             |
| $\delta$    | Probability that a cleanable agent was properly cleaned when “Cleaning Only” was performed                                                                          | -                                                    | 0.99     | -        | <i>assumed<sup>d</sup></i>  |
| $R_i$       | Number of crates containing raw produce introduced per hour                                                                                                         | -                                                    | 5        | -        | <i>observed</i>             |
| $S_c$       | Amount of raw produce material in grams introduced per crate                                                                                                        | -                                                    | 362874   | -        | <i>provided by facility</i> |
| $\tau_{ij}$ | Probability of <i>Listeria</i> spp. transfer from <i>i</i> to <i>j</i> agent given contact, where $i=j=$ Zone1, Zone 2, Zone 3, or Employee agent type <sup>e</sup> | $\tau_{ij}=10^{\text{Normal}(\text{TC},\text{STD})}$ | <i>f</i> | <i>f</i> | (16,19)                     |

253 <sup>a</sup>All parameters correspond to an hourly time scale. <sup>b</sup> $R_d=0.16$  means that an average of 6.4 crates  
254 with contaminated produce are received per shift on an average day. <sup>c</sup>veh=vehicle, neg=negligible.  
255 <sup>d</sup>Values were assumed when data was not available from literature or expert opinion. <sup>e</sup>TC=mean  
256 transfer coefficient, STD=standard deviation of the transfer coefficient; full data in Supplemental  
257 Tables S7 and S8 in S1 File. <sup>f</sup>Full data in Supplemental Table S9 in S1 File.

258

259 The models described above, and defined with parameters in Table 2 (and Tables S6-S9 in S1 File),  
260 were considered as the “baseline model” for Facilities A and B. All statistical analyses of data  
261 generated through model simulations were conducted in R 4.0.5 (20) using the ‘data.table’ package  
262 (21) to import large files. To aid interpretation and comparison of results from different sensitivity  
263 and scenario analyses, in each model iteration two primary outcomes of interest were recorded at  
264 Midday (12:00 pm) on Wednesday of the second simulation week (which in the model was coded as  
265 the last action before the mid-shift break). This timing for reporting of the model outcomes was

266 selected to allow for the observation of employee contamination levels just prior to going on break  
267 while equipment-related data was collected, mimicking the sampling methods in the historical EM  
268 data used for validation. The two outcomes of interest were: (i) the prevalence of contaminated  
269 agents ( $P_W$ ) and (ii) *Listeria* concentration on contaminated agents ( $C_W$ , CFU/cm<sup>2</sup>). The outcome  
270  $P_W$  was calculated by first estimating the prevalence of contaminated agents in one iteration  
271 (overall or in a specific subset of agents) and then to summarize prevalence across model iterations  
272 we used a boxplot; the median was recorded for comparisons. Similarly, the outcome  $C_W$  was  
273 summarized over agents (overall or in a specific subset of agents) and iterations using a boxplot; the  
274 median was recorded for comparisons.

275

## 276 **Validation and Verification**

277 Both models were validated using historical EM data collected from the respective facility and by  
278 recreating analogous *in silico* sampling scenarios that targeted the same equipment surfaces within  
279 the model. Historical EM data regarding *Listeria* presence throughout each facility was collected  
280 from a complementary study (22), in which Zone 2 and 3 surfaces were sampled using individually  
281 packaged sponges hydrated with 10 mL Dey-Engley neutralizing buffer. On a given day, sampling was  
282 performed by collecting 3-36 samples in Facility A, and 19-30 samples in Facility B; samples were  
283 collected 3-4 hours into a facility's production cycle and tested for the presence of *Listeria* spp. using  
284 the Food and Drug Administration Bacteriological Analytical Manual method (23). A simulated  
285 sampling routine was performed in each model using the sampling schedule and the number of  
286 samples used for collection of the historical data. Simulated sampling was weighted to favor sites  
287 that were historically more often sampled; the weight was calculated by dividing the individual  
288 agent's sampling probability by the sum of sampling probabilities of all agents in historical data:

$$289 \text{ Weighted } P(x_i) = \frac{P(x_i)}{\sum_i^m P(x_i)} \quad (\text{Eq. 1})$$

290 where  $x_i$  is an individual agent among a total of  $m$  agents and  $P$  stands for probability.

291 Simulated environmental sampling was interpreted with an assumed false negative rate of 10% if  
292 the agent's *Listeria* concentration was  $\leq 10$  CFU/cm<sup>2</sup>, and 1% if the contamination level was between  
293 11-100 CFU/cm<sup>2</sup>. Samples from agents with a *Listeria* concentration over 100 CFU/cm<sup>2</sup> were  
294 assumed to have a zero false negative rate (8). Each model (Facility A and B) was used to run a  
295 1,000-iteration BehaviorSpace experiment in NetLogo to determine the contamination status of  
296 agents representing historical sampling data and then compare model predictions with historical  
297 sampling data for the same sampled surfaces. Validation data were evaluated graphically and using  
298 a Chi Square Test, or Fisher's Exact Test (if the number of samples in the group were too small for  
299 use of Chi Square test), to determine if prevalence of positive samples in historical data was  
300 statistically significantly different from the mean prevalence of positive samples predicted by the  
301 model; these comparisons were conducted by shift, zone classification and wet/dry area type. The  
302 95% confidence intervals (95% CI) for the historical prevalences were estimated using the Wilson  
303 score interval method in the 'Hmisc' R package (24) to describe the level of certainty in the mean  
304 estimates while accounting for the sampling effort. Next, we graphically determined whether the  
305 95% CI for the historical data fall within the range of prevalences predicted by the model (described  
306 by boxplots).

307 Each model was additionally verified to be functioning correctly using NetLogo's own debugging tool  
308 for code integrity. Model mechanics were tested using extreme scenarios and simplified models that  
309 only ran isolated parts of the original systems. Models for both facilities were also tested on  
310 alternate hardware to ensure they remained functional on other computer systems.

## 311 **Sensitivity Analysis**

312 A 2-sided partial rank correlation coefficient (PRCC) evaluation using the 'epiR' R package (25) was  
313 used to perform a sensitivity analysis to identify relationships between the predicted agent  
314 contamination prevalence at Midday Week 2 of a randomly selected day from among the days when  
315 the facility underwent EM in historical data (Facility A: Monday, Tuesday, and Thursday; Facility B:  
316 Monday, Tuesday, and Wednesday) and specific input parameters. Coefficients were then filtered

317 against a Bonferroni-corrected significance level ( $p=0.05/46=0.0011$  and  $p=0.05/45=0.0011$  for  
318 Facility A and B, respectively).

319

## 320 **Scenario Analysis**

321 Scenario analyses evaluated the effect of several corrective actions that were created to simulate  
322 targeted control and cleaning strategies (Table 3). In Facility B, regular “Cleaning & Sanitation” of  
323 equipment is performed daily and thus these corrective actions were already embedded in the  
324 baseline model configuration of Facility B. However, Facility A performs both “Cleaning Only” and  
325 “Cleaning & Sanitation” procedures only once a week (Saturdays and Mondays, respectively),  
326 therefore scenario analysis for Facility A’s risk-based corrective actions additionally tested both (i)  
327 daily “Cleaning Only” of equipment and (ii) daily “Cleaning & Sanitation”. In scenarios involving  
328 modification of the Master Sanitization Schedule, agents previously designated as “uncleanable” (if  
329 that was because they were never cleaned according to the schedule of cleaning in the baseline  
330 model) could now be eligible to undergo cleaning (thus, their cleanability attribute would be  
331 changed to “cleanable”), depending on their respective predicted mean contamination probability in  
332 the baseline model. Scenario AI\_04 (“Transmission Pathways Modification Corrective Action”)  
333 involved the modification of connections between specific agents to represent corrective actions  
334 that had minimal impact to facility function and a higher likelihood of implementation by a facility in  
335 response to a contamination event. This criterion was determined by (i) identifying changes in the  
336 model that would involve the smallest number of modifications of agent-to-agent connections and  
337 (ii) considering the practical feasibility of making those changes in a packinghouse.

338 **Table 3. Corrective Action Scenarios and their virtual implementation within the Agent-Based**  
339 **Models.**

| Scenario                | Description                                                                                | Computational implementation <sup>a</sup>    | Scenario model-notation |
|-------------------------|--------------------------------------------------------------------------------------------|----------------------------------------------|-------------------------|
| Random Event Occurrence | The time until the next random introduction event to occur was extended by 25%, 50% or 75% | $P_r * 1.25$<br>$P_r * 1.50$<br>$P_r * 1.75$ | PR_01<br>PR_02<br>PR_03 |



|                                                              |                                                                                                                                                                                                                                                                                                                                                                                                                                                                                                                                                                                                                                                               | from baseline                                                                                                                          |         |
|--------------------------------------------------------------|---------------------------------------------------------------------------------------------------------------------------------------------------------------------------------------------------------------------------------------------------------------------------------------------------------------------------------------------------------------------------------------------------------------------------------------------------------------------------------------------------------------------------------------------------------------------------------------------------------------------------------------------------------------|----------------------------------------------------------------------------------------------------------------------------------------|---------|
| Random Load Reduction                                        | The amount of <i>Listeria</i> introduced by random contamination events was reduced by 1, 2 or 3 log <sub>10</sub> .                                                                                                                                                                                                                                                                                                                                                                                                                                                                                                                                          | $N_r * 0.1$                                                                                                                            | LR_01   |
|                                                              |                                                                                                                                                                                                                                                                                                                                                                                                                                                                                                                                                                                                                                                               | $N_r * 0.01$                                                                                                                           | LR_02   |
|                                                              |                                                                                                                                                                                                                                                                                                                                                                                                                                                                                                                                                                                                                                                               | $N_r * 0.001$                                                                                                                          | LR_03   |
| Z4 Event Occurrence Reduction                                | The probability of a Zone 4 introduction event occurring in an hour in the baseline model was reduced by 25%, 50% or 75% or set to zero.                                                                                                                                                                                                                                                                                                                                                                                                                                                                                                                      | $P_z * 0.75$                                                                                                                           | PZ_01   |
|                                                              |                                                                                                                                                                                                                                                                                                                                                                                                                                                                                                                                                                                                                                                               | $P_z * 0.50$                                                                                                                           | PZ_02   |
|                                                              |                                                                                                                                                                                                                                                                                                                                                                                                                                                                                                                                                                                                                                                               | $P_z * 0.25$                                                                                                                           | PZ_03   |
|                                                              |                                                                                                                                                                                                                                                                                                                                                                                                                                                                                                                                                                                                                                                               | $P_z * 0.00$                                                                                                                           | PZ_04   |
| Z4 Load Reduction                                            | The amount of <i>Listeria</i> introduced by Zone 4 contamination events was reduced by 1, 2 or 3 log <sub>10</sub> .                                                                                                                                                                                                                                                                                                                                                                                                                                                                                                                                          | $N_z * 0.1$                                                                                                                            | LZ_01   |
|                                                              |                                                                                                                                                                                                                                                                                                                                                                                                                                                                                                                                                                                                                                                               | $N_z * 0.01$                                                                                                                           | LZ_02   |
|                                                              |                                                                                                                                                                                                                                                                                                                                                                                                                                                                                                                                                                                                                                                               | $N_z * 0.001$                                                                                                                          | LZ_03   |
| <i>Listeria</i> Prevalence in Incoming Raw Produce Reduction | The baseline prevalence of product-borne <i>Listeria</i> arriving in the facility was reduced by 25%, 50% or 75% or set to zero. This simulated produce being treated prior to arriving in the packinghouse packing room.                                                                                                                                                                                                                                                                                                                                                                                                                                     | $R_d * 0.75$                                                                                                                           | EC_01   |
|                                                              |                                                                                                                                                                                                                                                                                                                                                                                                                                                                                                                                                                                                                                                               | $R_d * 0.50$                                                                                                                           | EC_02   |
|                                                              |                                                                                                                                                                                                                                                                                                                                                                                                                                                                                                                                                                                                                                                               | $R_d * 0.25$                                                                                                                           | EC_03   |
|                                                              |                                                                                                                                                                                                                                                                                                                                                                                                                                                                                                                                                                                                                                                               | $R_d * 0.00$                                                                                                                           | EC_04   |
| Cleaning Effectiveness Improvement                           | The amount of <i>Listeria</i> removed during “Cleaning Only” and “Cleaning & Sanitation” was increased by 3 log <sub>10</sub> . This simulates the usage of more powerful reduction techniques.                                                                                                                                                                                                                                                                                                                                                                                                                                                               | $\theta_d * 0.001$<br>or<br>$\theta_d * 0.001 \& \eta_d * 0.001$                                                                       | MI_01   |
| Weekend Deep Clean                                           | All <i>Listeria</i> in the facility was removed from all agents regardless of cleanability status every Sunday.                                                                                                                                                                                                                                                                                                                                                                                                                                                                                                                                               | <i>Listeria</i> concentration of affected agents set to zero at the time of the scheduled cleaning                                     | MI_02   |
| Enhanced Flume Water Treatment                               | The amount of <i>Listeria</i> on the flume agent in each model was reduced by 2 log <sub>10</sub> during each hour of production; this simulates a wash water treatment that effectively delivers a 2 log <sub>10</sub> reduction.                                                                                                                                                                                                                                                                                                                                                                                                                            | <i>Flume agent load</i> * 0.01                                                                                                         | AI_01   |
| Broad Model-based Master Sanitation Schedule Restructuring   | Agent cleaning and sanitation schedules were reassigned according to mean contamination probability predicted in the baseline model over the second week. An agent could be assigned one of three options:<br>(i) weekly schedule (when the agent’s predicted contamination probability was ≤32%),<br>(ii) alternating days (33-65%),<br>(iii) daily (≥66%).<br>At the scheduled cleaning and sanitation, <i>Listeria</i> concentration on select agents was reduced by $\vartheta_d$ or $\eta_d$ as appropriate. In the case of Facility A, where a daily schedule did not previously exist, one was implemented using either “Cleaning Only” or “Cleaning & | <i>Listeria</i> concentration of affected agents reduced by $\vartheta_d$ at the time of the scheduled “Cleaning Only” (Facility A)    | AI_02C1 |
|                                                              |                                                                                                                                                                                                                                                                                                                                                                                                                                                                                                                                                                                                                                                               | <i>Listeria</i> concentration of affected agents reduced by $\eta_d$ at the time of the scheduled “Cleaning & Sanitation” (Facility A) | AI_02C2 |
|                                                              |                                                                                                                                                                                                                                                                                                                                                                                                                                                                                                                                                                                                                                                               | <i>Listeria</i> concentration of affected agents reduced by $\eta_d$ at the time of the scheduled “Cleaning & Sanitation” (Facility B) | AI_02   |

|                                                               |                                                                                                                                                                                                                                                                                                                                                                                                                                                                                                                                                                                                                                                                                                                  |                                                                                                                                                             |         |
|---------------------------------------------------------------|------------------------------------------------------------------------------------------------------------------------------------------------------------------------------------------------------------------------------------------------------------------------------------------------------------------------------------------------------------------------------------------------------------------------------------------------------------------------------------------------------------------------------------------------------------------------------------------------------------------------------------------------------------------------------------------------------------------|-------------------------------------------------------------------------------------------------------------------------------------------------------------|---------|
|                                                               | Sanitation". This simulates a "risk-based reorganization of the cleaning and sanitation schedule".                                                                                                                                                                                                                                                                                                                                                                                                                                                                                                                                                                                                               |                                                                                                                                                             |         |
| Directed Model-based Master Sanitation Schedule Restructuring | Only agents predicted to have a mean contamination probability $\geq 66\%$ in the baseline model were scheduled for daily cleaning and sanitation, meaning that <i>Listeria</i> concentration on these agents was reduced by $\vartheta_d$ or $\eta_d$ as appropriate on agents scheduled to be cleaned at that frequency; other agents were left with their original cleaning and sanitation scheduling. In the case of Facility, A where a daily schedule did not previously exist, one was implemented using either "Cleaning Only" or "Cleaning & Sanitation". This simulates a "partial reorganization of the cleaning and sanitation schedule of surfaces determined to be most at risk of contamination". | <i>Listeria</i> concentration of affected agents reduced by $\vartheta_d$ at the time of the scheduled "Cleaning Only" (Facility A)                         | AI_03C1 |
|                                                               |                                                                                                                                                                                                                                                                                                                                                                                                                                                                                                                                                                                                                                                                                                                  | <i>Listeria</i> concentration of affected agents reduced by $\eta_d$ at the time of the scheduled "Cleaning & Sanitation" (Facility A)                      | AI_03C2 |
|                                                               |                                                                                                                                                                                                                                                                                                                                                                                                                                                                                                                                                                                                                                                                                                                  | <i>Listeria</i> concentration of affected agents reduced by $\eta_d$ at the time of the scheduled "Cleaning & Sanitation" (Facility B)                      | AI_03   |
| Transmission Pathways Modification Corrective Action          | Links between specific agents were severed to represent physical isolation between them. In Facility A the interconnected drain system was compartmentalized so that agents could only receive <i>Listeria</i> (but not spread it further) while in Facility B each forklift was assigned to a single separate area.                                                                                                                                                                                                                                                                                                                                                                                             | Modified links defined at beginning of scenario                                                                                                             | AI_04   |
| Combined Corrective Action 01                                 | Facility A ran scenarios EC_02 and AI_02C2 simultaneously, while Facility B ran scenarios EC_02 and AI_03. This simulated the simultaneous application of (i) reduced <i>Listeria</i> prevalence in incoming produce and (ii) the most effective schedule-based corrective action for each facility.                                                                                                                                                                                                                                                                                                                                                                                                             | $R_d * 0.50$ ; <i>Listeria</i> concentration of affected agents reduced by $\eta_d$ at the time of the scheduled cleaning                                   | CI_01   |
| Combined Corrective Action 02                                 | EC_02 and AI_04 were applied in the model simultaneously, this simulated the simultaneous application of (i) reduced <i>Listeria</i> prevalence in incoming produce and (ii) agent compartmentalization.                                                                                                                                                                                                                                                                                                                                                                                                                                                                                                         | $R_d * 0.50$ ; Modified links defined at beginning of scenario                                                                                              | CI_02   |
| Combined Corrective Action 03                                 | Facility A ran scenarios AI_02C2 and AI_04 simultaneously, while Facility B ran scenarios AI_03 and AI_04. This simulated the simultaneous application of (i) each model's most effective                                                                                                                                                                                                                                                                                                                                                                                                                                                                                                                        | <i>Listeria</i> concentration of affected agents reduced by $\eta_d$ at the time of the scheduled cleaning; Modified links defined at beginning of scenario | CI_03   |

---

schedule-based corrective action  
and (ii) agent  
compartmentalization.

---

340 <sup>a</sup>Parameter notations are defined in Table 2.

341

342 Each corrective action scenario (54 in total: Facility A: 28, Facility B: 26) was evaluated by running  
343 1,000 iterations. Scenario analyses simulations used the same fixed seed as in the baseline model to  
344 assure a fair (counterfactual) comparison among scenarios and between each scenario and the  
345 baseline model. Efficacy of a corrective action was evaluated by comparing the prevalence of  
346 contaminated agents, separately for wet and dry area, in counterfactual iterations of the baseline  
347 model and the model with a corrective action implemented using Eq. 2. The efficacy for each  
348 iteration was defined as:

$$349 \quad Efficacy = \left(1 - \frac{P_{ca+c}}{P_{b+c}}\right) \times 100 \quad (Eq. 2)$$

350 where  $P_b$  stands for prevalence in the baseline model iteration and  $P_{ca}$  stands for prevalence in the  
351 corresponding iteration of the model with a corrective action. Constant  $c$  is a correction factor  
352 corresponding to  $0.5/m$  (where  $m$  is the total number of agents of the area type in the model, i.e.,  
353 Facility A: dry agents=171, wet agents=53; Facility B: dry agents=176 and wet agents=49); this  
354 correction factor was applied to be able to calculate the efficacy in iterations where prevalence in  
355 the baseline model was zero. Efficacy over all iterations was summarized with the median and  
356 interquartile range (IQR) statistics. The IQR was specifically used due to it being a robust measure of  
357 dispersion as it represents the middle 50% of the sample and is thus not influenced by outliers (26).

358 The estimate of efficacy of a corrective action provides useful information about the relative change  
359 in prevalence of contamination between the compared scenario and the baseline but it does not  
360 assess the magnitude of contamination for each scenario. Thus, the distribution of both predicted  
361 prevalence of contamination and concentration of *Listeria* on contaminated agents over all  
362 iterations were compared between the baseline and promising corrective action scenarios

363 (identified based on sensitivity and efficacy analysis). The comparisons were presented graphically as  
364 boxplots for each scenario by wet and dry areas. For ease of interpretation, we estimated the  
365 difference between the median prevalence (expressed as percentage point (pp) difference) and  
366 between median concentration (expressed as  $\log_{10}$  CFU/cm<sup>2</sup>) for the corrective action scenario and  
367 the baseline. Data files and code used to build the two agent-based models using NetLogo, as well as  
368 data files and R code relevant to the scenario analysis and sensitivity analysis, are available on the  
369 GitHub repository: [https://github.com/lvanekLab/CPS\\_ABM](https://github.com/lvanekLab/CPS_ABM). No statistical tests were performed to  
370 compare simulation predictions to other simulation predictions (e.g., corrective actions versus the  
371 baseline) as the modeler controls the number of replications produced (effectively “sample size”) by  
372 selecting the number of iterations and thus with sufficient computer time, there is no limit to how  
373 small a p-value value can be obtained (27). Furthermore, no comparisons were made in corrective  
374 action performance between the two Facilities (e.g., EC\_04 in Facility A versus Facility B) due to key  
375 differences in their layout, schedules and specific equipment used, because of which the facility  
376 specific models were developed as opposed to a generic model; thus, statistical comparisons  
377 between the two models may lead to misleading conclusions.

## 378 **Results**

### 379 **Validation**

380 The baseline models were validated with historical data for Facilities A and B at both whole-model  
381 and area-specific levels (Fig 2; Table S10 in S1 File). All comparisons indicated lack of statistically  
382 significant differences (either with Chi Squared Test or Fisher’s Exact Test as appropriate) between  
383 agent contamination prevalence observed in historical data and mean prevalence obtained with  
384 simulated environmental sampling.

385

386

Figure\_2.tiff

387 **Fig 1. Graphical comparison of baseline Facilities A and B using historical data at midday against**  
388 **simulated sampling results.** Results for Facility A and depicted in panels A, C and E, while results for  
389 Facility B are in panels B, D and F. Validation groupings investigated included (i) all agents (panels A  
390 and B), (ii) Zone category (panels C and D), and (iii) presence of water in the area (panels E and F).  
391 Lack of differences between historical (black, covering the mean (denoted with  $\bar{x}$ ) and 95%  
392 confidence intervals for contamination prevalence) and simulated sampling (colored boxplots,  
393 describing the mean (denoted with  $\bar{x}$ ), median, interquartile range, 5<sup>th</sup> and 95<sup>th</sup> percentiles and any  
394 outliers for contamination prevalence) groups indicated the model's behavior could be considered  
395 representative of its respective facility.

396

### 397 **Predicted *Listeria* prevalence and concentration in wet** 398 **versus dry areas**

399 The Facility A wet areas had median agent contamination prevalence of 25.9% and 23.1% within the  
400 Loading area and Cleaning area (i.e., the model's "wet" area), respectively (Fig 3.A), while the Facility  
401 B Loading area and Cleaning area had respective median prevalence of 42.9% and 17.9% (Fig 3.B).  
402 "Dry" areas (i.e., combination of remaining facility areas not in proximity to water) had a lower  
403 prevalence of *Listeria* positive agents, with Facility A having medians of 6.3%, 4.1%, 1.7%, 11.1% and  
404 7.7% for the Sorting, Tray Packing, Bag Packing, Reject and Other areas, respectively (Fig 3.A). Facility  
405 B did not feature an active Bag Packing area, but all its remaining dry areas except the Reject area  
406 had medians of 0%; the Reject area median prevalence was 21.7% (Fig 3.B). Within each area, the  
407 concentration of *Listeria* on contaminated agents was recorded and analyzed. Figs 3.C and 3.D show  
408 the low concentrations (in  $\log_{10}$  CFU/cm<sup>2</sup>) for Facilities A and B respectively, across all wet and dry  
409 areas in the modeled facilities. Each area group contained a combination of agents belonging to  
410 Zone 1-3. Visual evaluation of agents grouped by hygienic Zone revealed an overall higher  
411 prevalence and concentration in Zone 3 agents compared to Zones 1 and 2 (Fig S2 in S1 file).

412

413 Figure\_3.tiff

414 **Fig 3. Boxplots describing *Listeria* contamination prevalence and concentration on contaminated**  
415 **agents on Wednesday at Midday for Facility A and B baseline conditions.** Prevalence of *Listeria*  
416 contamination within each area of Facility A (panel A) and Facility B (panel B). Both facilities show  
417 higher prevalence in wet areas (blue) than dry areas (yellow), except for the Reject area.  $\log_{10}$

418 concentrations (CFU/cm<sup>2</sup>) of *Listeria* on contaminated agents within each area of Facility A (panel C)  
419 and Facility B (panel D) with median concentrations listed showing low level of contamination.

420

## 421 Sensitivity Analysis

422 The effects of model input parameters on  $P_W$ , analyzed using PRCC, are depicted in Fig 4. The most  
423 influential parameters were the concentration of *Listeria* spp. per gram of contaminated raw  
424 produce ( $N_R$ ) and the probability of contact between Zone 1 agents ( $P_{11}$ ). In Facility A the probability  
425 of *Listeria* transfer between Zone 3 agents given contact ( $\tau_{33}$ ) was negatively correlated with  
426 prevalence of contaminated agents, while the transfer probability between Zone 1 agents and Zone  
427 3 agents ( $\tau_{13}$ ) was negatively correlated in Facility B (Fig 4). In both facilities the negatively correlated  
428 parameters involved equipment that was connected to drainage systems within the facilities (as well  
429 as interconnected drains in Facility A, which are designated Zone 3); *Listeria* in the drainage system  
430 could not re-contaminate other agents and instead would show die off, which led to the negative  
431 correlation.

432

433

Figure\_4.tiff

434 **Fig 4. Sensitivity plots of significant model input parameters against prevalence of *Listeria***  
435 **contaminated agents at midday Wednesday of the second week of simulation for each facility.**  
436 Significant partial rank correlation coefficient (PRCC) values were determined using Bonferroni  
437 correction according to the number of parameters evaluated in Facilities A and B, respectively. ( $N_R$ :  
438 Concentration of *Listeria* spp. per gram of contaminated raw produce (CFU/g);  $P_{ij}$ : Probability of  
439 contact from contaminated surface in Zone  $i$  to another surface in Zone  $j$ , where  $i=j=$ Zone1, Zone 2,  
440 Zone 3 or Employee agent type;  $P_o$ : Rate of random event occurrences that introduces *Listeria* spp.  
441 from outside the room per hour;  $P_z$ : Probability that *Listeria* spp. is introduced into the room via  
442 objects from Zone 4 per hour;  $R_d$ : Prevalence of *Listeria* spp. in produce on day  $d$ , for  $d =$  Monday,  
443 Tuesday, Wednesday, Thursday, Friday;  $\alpha$ : Proportion of *Listeria* spp. transferred to a surface upon  
444 contact with a contaminated raw produce;  $\tau_{ij}$ : Probability of *Listeria* spp. transfer from  $i$  to  $j$  agent  
445 given contact, where  $i=j=$ Zone1, Zone 2, Zone 3, or Employee agent type.;  $N_z$ : Amount of *Listeria* spp.  
446 introduced to an agent or patch from Zone 4 (CFU) per occurrence)

447

## 448 Scenario Analysis

449 Comparison of modeled corrective actions with the baseline model allowed for evaluation of the  
450 efficacy of each corrective action and provided data for prioritizing strategies for virtual

451 implementation to evaluate the magnitude of contamination for each scenario (Fig 5-6; Table S11 in  
452 S1 File). Based on efficacies that did not produce a positive result in both wet and dry areas of  
453 respective facility and sensitivity analysis results, Random Event Occurrence Reduction (PR), Random  
454 Load Reduction (LR), Z4 Event Occurrence Reduction (PZ) and Z4 Load Reduction (LZ) corrective  
455 actions were deemed ineffective (Fig S3-S6 in S1 File) and were excluded from further analysis of the  
456 magnitude of contamination.

457

458

Figure\_5.tiff

459 **Fig 5. Comparison of corrective action efficacy against baseline conditions in Facility A.** Efficacy was  
460 calculated using eq. 2 for each area (i.e., “wet” and “dry”) within a model for each applicable  
461 corrective action and displayed by median efficacy (red line marker) and interquartile range (black  
462 dot crossed by line marker). Positive efficacy indicated a lower *Listeria* prevalence in the model with  
463 a corrective action compared to the baseline model and thus effectiveness of the corrective action,  
464 while zero or negative efficacy indicated that the corrective action is predicted to not be able to  
465 reduce the agent contamination prevalence. Panel A: Facility A Wet area. Panel B: Facility A Dry area.  
466 PR\_01-PR\_03: Random Event Occurrence Reduction (125%; 150%; 175% event delay from baseline  
467 respectively). LR\_01-LR\_03: Random Load Reduction (1-3 Log<sub>10</sub>, respectively). PZ\_01-PZ\_04: Z4 Event  
468 Occurrence Reduction (25%; 50%; 75%; 100% reduction from baseline respectively). LZ\_01-LZ\_03: Z4  
469 Load Reduction (1-3 Log<sub>10</sub>, respectively). EC\_01-EC\_04: Reduction of *Listeria* Prevalence in incoming  
470 produce (25%; 50%; 75%; 100% reduction from baseline, respectively). MI\_01: Cleaning  
471 Effectiveness Improvement (increased *Listeria* removed during reduction events increased by 3  
472 log<sub>10</sub>). MI\_02: Weekend Deep Clean (Removal of *Listeria* from all agents regardless of cleanability  
473 status every Sunday). AI\_01: Enhanced Flume Water Treatment (2 log<sub>10</sub> removal of *Listeria* in flume  
474 agent per hour of production). AI\_02/AI\_02C1/AI\_02C2: Broad Model-based Master Sanitization  
475 Restructuring (Agent cleaning and sanitation schedules were fully reassigned according to a mean  
476 contamination probability; Facility A was given a daily schedule for both “Cleaning Only” and  
477 “Cleaning & Sanitation” respectively). AI\_03/AI\_03C1/AI\_03C2: Directed Model-based Master  
478 Sanitization Schedule Restructuring (Sanitization of agents with a mean contamination probability  
479 ≥66% was set to a daily frequency; Facility A was given a daily schedule for both “Cleaning Only” and  
480 “Cleaning & Sanitation” respectively). AI\_04: Transmission Pathways Modification Corrective Action  
481 (Drain compartmentalization). CI\_01: EC\_02 and AI\_02C2 were applied simultaneously. CI\_02: EC\_02  
482 and AI\_04 were applied simultaneously. CI\_03: AI\_02C2 and AI\_04 were applied simultaneously.

483

484

485

Figure\_6.tiff

486 **Fig 6. Comparison of corrective action efficacy against baseline conditions in Facility B.** Efficacy was  
487 calculated using eq. 2 for each area (i.e., “wet” and “dry”) within a model for each applicable

488 corrective action and displayed by median efficacy and interquartile range. Positive efficacy  
489 indicated a lower *Listeria* prevalence in the model with a corrective action compared to the baseline  
490 model and thus effectiveness of the corrective action, while zero or negative efficacy indicated that  
491 the corrective action is predicted to not be able to reduce the agent contamination prevalence.  
492 Panel A: Facility B Wet area. Panel B: Facility B Dry area. PR\_01-PR\_03: Random Event Occurrence  
493 Reduction (125%; 150%; 175% event delay from baseline respectively). LR\_01-LR\_03: Random Load  
494 Reduction (1-3 Log<sub>10</sub>, respectively). PZ\_01-PZ\_04: Z4 Event Occurrence Reduction (25%; 50%; 75%;  
495 100% reduction from baseline respectively). LZ\_01-LZ\_03: Z4 Load Reduction (1-3 Log<sub>10</sub>,  
496 respectively). EC\_01-EC\_04: Reduction of *Listeria* Prevalence in incoming produce (25%; 50%; 75%;  
497 100% reduction from baseline, respectively). MI\_01: Cleaning Effectiveness Improvement (increased  
498 *Listeria* removed during reduction events increased by 3 log<sub>10</sub>). MI\_02: Weekend Deep Clean  
499 (Removal of *Listeria* from all agents regardless of cleanability status every Sunday). AI\_01: Enhanced  
500 Flume Water Treatment (2 log<sub>10</sub> removal of *Listeria* in flume agent per hour of production).  
501 AI\_02/AI\_02C1/AI\_02C2: Broad Model-based Master Sanitization Restructuring (Agent cleaning and  
502 sanitation schedules were fully reassigned according to a mean contamination probability).  
503 AI\_03/AI\_03C1/AI\_03C2: Directed Model-based Master Sanitization Schedule Restructuring  
504 (Sanitization of agents with a mean contamination probability ≥66% was set to a daily frequency).  
505 AI\_04: Transmission Pathways Modification Corrective Action (Separation of forklift area  
506 assignment). CI\_01: EC\_02 and AI\_03 were applied simultaneously. CI\_02: EC\_02 and AI\_04 were  
507 applied simultaneously. CI\_03: AI\_03 and AI\_04 were applied simultaneously.

508

## 509 **Modifying Prevalence of *Listeria* Contamination in** 510 **Incoming Produce**

511 Reducing the prevalence of *Listeria* on incoming raw produce (scenarios EC\_01, EC\_02, EC\_03 and  
512 EC\_04) showed a corresponding drop in median prevalence of contamination on agents in both wet  
513 and dry areas. Facility A showed a maximum reduction (at EC\_04) of 32.07 pp and 2.34 pp (Fig S7.A)  
514 for wet and dry area, respectively. Median *Listeria* concentrations on positive agents per area  
515 decreased by 0.57 log<sub>10</sub> CFU/cm<sup>2</sup> and 0.52 log<sub>10</sub> CFU/cm<sup>2</sup>, respectively (Fig S7.C).

516 The maximum impact of reducing contamination prevalence on incoming raw produce in Facility B  
517 led to a reduction of 20.41 pp in median contamination prevalence for the wet area, and a median  
518 prevalence reduction of 1.70 pp in the dry area (Fig S7.B). Wet area *Listeria* concentrations on  
519 positive agents also showed a substantial decrease in predicted median (1.05 log<sub>10</sub> CFU/cm<sup>2</sup>; Fig  
520 S7.D), while predicted median *Listeria* concentrations in dry areas only were reduced by 0.20 log<sub>10</sub>  
521 CFU/cm<sup>2</sup>.

522



## 523 **Enhanced Cleaning and Sanitation Strategies**

524 Improving the effectiveness of *Listeria* removal actions (“Cleaning Only” and “Cleaning & Sanitation”;  
525 scenario MI\_01) by 3 log<sub>10</sub> showed no meaningful changes in Facility A or Facility B's median *Listeria*  
526 prevalence or concentration for either wet or dry areas. Weekend deep cleaning (scenario MI\_02)  
527 however, led to considerable reduction of median prevalence in both models. Facility A wet area  
528 prevalence decreased by 24.53 pp (Fig S8.A) and Facility B wet area prevalence decreased by 16.33  
529 pp (Fig S8.B).

530

## 531 **Agent-Targeted Corrective Actions**

532 In Facility A the enhanced flume water treatment (scenario AI\_01) and risk-based (scenarios AI\_02C1  
533 and AI\_02C2) “Cleaning Only”/ “Cleaning & Sanitation” corrective actions showed the best  
534 performance in reducing both facility-wide median prevalence of contaminated agents; risk-based  
535 corrective actions are activities that target agents with higher probabilities of becoming  
536 contaminated according to the baseline model. Of the risk-based corrective actions applied, AI\_02C2  
537 had the largest impact in the wet areas (Fig S9.A), producing a median decrease in prevalence of  
538 contaminated agents against the baseline of 28.30 pp and a median decrease in concentration of  
539 0.36 log<sub>10</sub> CFU/cm<sup>2</sup>. In contrast, AI\_01 was the most effective in Facility B's wet area, but AI\_03 was  
540 more effective in the dry area, producing a median prevalence decrease of 12.24 pp and 0.57 pp for  
541 each area respectively in AI\_01, and 10.20 pp and 2.27 pp in AI\_03 (Fig S9.B). Median concentration  
542 on positive agents decreased by 0.40 log<sub>10</sub> CFU/cm<sup>2</sup> and 0.05 log<sub>10</sub> CFU/cm<sup>2</sup> of each respective area  
543 in AI\_01, and decreased by 0.25 log<sub>10</sub> CFU/cm<sup>2</sup> and 0.12 log<sub>10</sub> CFU/cm<sup>2</sup> for each respective area in  
544 AI\_03 (Fig S9.D).

545 The “Transmission Pathways Modification Corrective Action” (AI\_04) was applied to each model by  
546 eliminating connection links chosen to have minimal impact to facility function and a higher  
547 likelihood of implementation by a facility in response to a contamination event. This  
548 compartmentalization seeks to limit the spread of *Listeria* moving between zones (i.e., non-FCS-to-

549 FCS transmission) by reducing the number of connections for strategically chosen agents. For  
550 example, in Facility A, the network of indoor square and trench drains was remodeled as isolated  
551 agents to simulate the introduction of anti-backflow valves within the system. This intervention  
552 reduced the Facility A wet area *Listeria* prevalence by 15.09 pp, concentration by 0.13 CFU/cm<sup>2</sup>, dry  
553 area prevalence by 2.92 pp and the concentration by 0.70 log<sub>10</sub> CFU/cm<sup>2</sup>. In Facility B, the AI\_04  
554 corrective action involved assigning a single forklift to the Loading area operations, and one to its  
555 Reject area, rather than allowing both forklifts to interact with both areas. While this change in  
556 traffic patterns (i.e., connections) was effective for reducing the likelihood of *Listeria* contamination  
557 in the Facility B dry area, producing a median prevalence reduction of 3.41 pp, the amount of  
558 contamination on contaminated agents slightly increased by 0.20 log<sub>10</sub> CFU/cm<sup>2</sup>. As the corrective  
559 action was tailored to facility, it is unsurprising that the results of AI\_04 differed between models.  
560 Compartmentalizing Facility A's drains prevented spread between wet and dry areas of the model,  
561 thus producing a facility-wide reduction in prevalence and concentration (Fig S9.A), while isolating  
562 Facility B's forklifts only impacted prevalence in dry areas.

563

## 564 **Combined Corrective Actions**

565 Of the three combined corrective actions, combinations CI\_01 and CI\_03 were most effective in  
566 reducing *Listeria* prevalence in Facility A wet areas (Fig S10.A; reduction of 24.53 pp for both);  
567 combination CI\_01 decreased median concentration in the wet area by 0.44 log<sub>10</sub> CFU/cm<sup>2</sup>. For the  
568 dry areas, Scenario CI\_03 showed the greatest reduction and efficacy with a median concentration  
569 decrease of 0.59 log<sub>10</sub> CFU/cm<sup>2</sup> in the dry area (Fig S10.C).

570 In Facility B wet areas, CI\_01 was the most effective correction action with a prevalence reduction of  
571 14.29 pp (Fig S10.B). Median concentration among contaminated wet areas dropped by 0.39 log<sub>10</sub>  
572 CFU/cm<sup>2</sup> (Fig S10.D). CI\_02 and CI\_03 were more effective in the dry areas with a decrease in  
573 prevalence of 3.41 pp for both; median concentration among contaminated dry areas increased by  
574 0.08 and 0.20 log<sub>10</sub> CFU/cm<sup>2</sup>, respectively (Fig S10.D).

575

## 576 **Discussion**

577 This study described the development of two ABMs of *Listeria* contamination dynamics in produce  
578 packinghouses, demonstrating their successful validation and characterization of baseline behaviors.  
579 Both facilities were functionally similar, receiving raw produce that is subsequently washed, sorted,  
580 and packed. However, the facilities differed in layout and specific food safety practices (e.g.,  
581 frequency of “Cleaning Only” and “Cleaning & Sanitation” cleaning operations), which are important  
582 to consider when evaluating the risk of environmental *Listeria* contamination and mitigation  
583 strategies. Using the developed models, a range of corrective actions were tested, further  
584 demonstrating strengths of such ABMs as a decision support tool for industries. The most effective  
585 corrective actions in both models were: (i) reducing incoming *Listeria* on contaminated produce, (ii)  
586 simulation-informed modification of cleaning and sanitation strategies and (iii) eliminating specific  
587 agent-to-agent transmission pathways. While most of these corrective actions were more effective  
588 in the wet area of the respective facility than dry, eliminating specific transmission pathways (i.e.,  
589 AI\_04) was more effective in reducing the prevalence of Facility B’s dry area.

### 590 ***Listeria* Dynamics in Modelled Produce Packinghouses**

591 Both models predicted elevated *Listeria* contamination within areas characterized as often  
592 containing a high level of water, such as those areas involved in raw produce loading or cleaning  
593 operations. This predicted pattern of increased prevalence in areas containing high levels of water  
594 agrees with findings regarding the water activity required for *L. monocytogenes* growth by Pietrysiak  
595 et al. and Farber et al. (28,29). However, the Reject area (which was classified as “dry”) was also  
596 predicted to show elevated *Listeria* contamination prevalence compared to other Dry areas. While  
597 there may not have been water directly involved in this Reject area, wet or damaged produce was  
598 stored in large crates in this area for extended periods. This area contains “sink” sites that receive  
599 *Listeria*, but do not transfer it to another agent (sink sites were also described by Malley et al. (30)).  
600 Importantly, increased *Listeria* prevalence does not always rely on growth, it can simply reflect

601 increased introduction without actual growth. The predicted concentration of *Listeria* on positive  
602 agents was highly variable within all production areas in the two facilities though concentrations  
603 appeared lower in the dry areas in facility B and some of the production areas in facility A. The  
604 median predicted concentrations were relatively low in both models. It is possible that the low  
605 concentration of *Listeria* within both models reduced the probability of cross-contamination  
606 occurring, and subsequently reducing how far *Listeria* can be transmitted throughout a facility. The  
607 low concentrations on positive agents would in reality also be more difficult to detect (31).

608 Dry areas showed lower contamination prevalence, but their closer proximity to the end of the  
609 product line presents a risk of contaminating finished produce. These areas are less likely to be  
610 contaminated by *Listeria* on incoming raw produce due to their distance from the loading area and  
611 lack of water in the area. This does not prevent them from being contaminated through alternative  
612 means (i.e., Zone 4 introduction) based on the facility's design. In this case, it is possible for other  
613 *Listeria* contamination routes to bypass other stages of a product line and reach finished produce  
614 more quickly. However, in these two models no Zone 2 or 3 surfaces were close enough to a Zone 4  
615 introduction site to cause a large amount of *Listeria* contamination from it. Ultimately this is a  
616 facility-specific issue dependent on local layout and not mutually exclusive from introduction on  
617 contaminated raw produce.

618 Sensitivity analysis identified the concentration of *Listeria* spp. per gram of contaminated raw  
619 produce ( $N_R$ ) and probability of contact from a contaminated surface in Zone 1 to another surface in  
620 Zone 1 ( $P_{11}$ ) as the two most influential factors in prevalence of *Listeria* contaminated agents in both  
621 facilities. Similar to previous reports (32,33), this suggests that if incoming produce is a primary  
622 source of *Listeria* introduced to the facilities, it would be able to rapidly spread among FCSs as  
623 mediated by  $P_{11}$  and subsequently contaminate finished product. In reality, it is difficult to trace the  
624 movement of *Listeria* spp. through a facility to such a fine degree. However, it is possible that even  
625 with a low contamination prevalence a sufficiently high volume of incoming raw produce may lead

626 to introduction of an amount of *Listeria* that is likely to spread into the rest of the facility from the  
627 initial introduction site. Berrang et al., (34) suggest a mechanism of *Listeria spp.* introduction like this  
628 may also occur in poultry processing plants. These results, combined with the lack of zone 1 data for  
629 model validation, emphasize the need for further research into postharvest *Listeria* levels on raw  
630 produce. This is both to better understand *Listeria* introduction behavior via a potentially major  
631 introduction route, and to produce more accurate models that act on *Listeria* introduced on raw  
632 contaminated produce.

### 633 **Limiting *Listeria* Introduction into Produce Packinghouses**

634 Corrective actions applied to the models were initially designed around targeting the three routes of  
635 *Listeria* introduction into a facility (i.e., contaminated raw produce, Zone 4, or random occurrences)  
636 to assess the effectiveness of preventing “exterior” *Listeria* entering the facility. Factors to consider  
637 in these corrective actions include: facility layout (especially agent proximity to potential Zone 4  
638 introduction sites (34,35)), postharvest contamination status of raw produce, and employee  
639 movement patterns. Incoming raw produce (the primary route in both models) has also been  
640 identified as a key vehicle of introduction in other studies involving *L. monocytogenes* (34,36–38),  
641 reinforcing the findings of both the sensitivity analysis and route-based corrective action  
642 comparisons. Although controlling the prevalence of *Listeria* on incoming raw produce can be  
643 difficult given the abundance and randomness of external sources that can contaminate produce  
644 before reaching a packinghouse (39,40), stringent implementation and verification of Good  
645 Agricultural Practices (GAP) and other supply chain programs could represent one strategy to reduce  
646 *Listeria* prevalence on incoming raw produce.

647 Corrective actions involving remaining introduction routes (Zone 4 or random occurrences) were  
648 eliminated early on due to poor performance in both models. In the case of Zone 4-based corrective  
649 actions some improved performance was seen in each model’s Dry area contamination prevalence  
650 (i.e., those closer to Zone 4 introduction sites), but was not effective across both areas. However,  
651 this reinforces importance of considering the facility specific layout in designing corrective actions

652 because this type of corrective action would be more effective in facilities that have Zone 4  
653 occurrences affecting a larger number of surfaces.

654

## 655 **Modifying Surface Cleanability and *Listeria* Harborage** 656 **Capabilities**

657 A second series of corrective actions were formed under the assumption that introduction could not  
658 be reduced, effectively targeting *Listeria* that has successfully entered the virtual facility. These  
659 measures involved enhancing or reorganizing existing measures used to reduce *Listeria*, such as  
660 increasing the effectiveness and frequency of sanitation events or changing in plant transmission  
661 routes (e.g., by restricting equipment such as forklifts to a specific room). While the exact  
662 implementation differed between modeled facilities, similar corrective actions have been historically  
663 implemented to control *Listeria* spread within food facilities, specifically in the forms of increased  
664 cleaning and sanitation frequency or replacing equipment with easier to clean versions (increasing  
665 cleanability), or by modifying equipment to eliminate niches (reducing harborage) (6) (both of which  
666 were implicitly and simplistically represented in the developed ABMs in corrective action scenarios  
667 that altered an agent's cleanability, from uncleanable to cleanable).

668 The two types of cleaning and sanitation schedule restructuring evaluated were: (i) broad, where  
669 surfaces are eligible for cleaning and sanitation, with the mean contamination probability  
670 determining specific schedule frequency, and (ii) directed, where surfaces with a mean  
671 contamination probability  $\geq 66\%$  are cleaned and sanitized every day of the work week. A key  
672 difference in the *Listeria* contamination prevalence outcomes following restructuring of the cleaning  
673 and sanitation schedule between both facilities is due to differences in their initial schedules; with  
674 Facility A only performing a weekly cleaning and sanitation operation, and Facility B cleaning and  
675 sanitation at a daily frequency. As a result, introducing a higher frequency of cleaning and sanitation  
676 operations for more surfaces showed an improvement for Facility A regardless of whether the  
677 cleaning and sanitation scenario implemented is more (AI\_02C2: "Cleaning & Sanitation") or less

678 (AI\_02C1: “Cleaning Only”) comprehensive. This improvement was less effective in directed  
679 restructuring (AI\_03C1/AI\_03C2), as fewer surfaces were scheduled to undergo daily cleaning or  
680 cleaning and sanitation regardless of the method used. Conversely, in Facility B’s wet areas the  
681 corrective actions AI\_02 and AI\_03 were effective to similar degrees (having the same median  
682 prevalence in wet areas). Similarly, in Facility B’s dry areas, broad (AI\_02) and directed (AI\_03)  
683 rescheduling also produced similar reductions in median *Listeria* contamination prevalence (though  
684 differed from each other by a near negligible amount). These reductions in contamination  
685 prevalence in both areas of Facility B are likely due to the new cleaning and sanitization schedule in  
686 corrective actions AI\_02 and AI\_03 now targeting key agents in Facility B that were previously not  
687 cleaned and sanitized at a sufficient frequency in the baseline scenario. These specific agents were  
688 targeted in both corrective actions (AI\_02 and AI\_03) of Facility B due to their mean contamination  
689 probability being  $\geq 66\%$ . However, while both forms of rescheduling were effective across both areas  
690 in Facility B, it is important to reiterate that directed rescheduling (AI\_03C1/AI\_03C2) was not as  
691 effective as broad rescheduling (AI\_02C1/AI\_02C2) in Facility A. This highlights an important point  
692 that while the predicted contamination probability of an agent (i.e., a surface that the agent  
693 represents) can be a useful decision support component, it should not necessarily be the sole  
694 defining factor for determining the frequency of its cleaning and sanitation. Instead, creating  
695 cleaning and sanitation schedules should consider prior conditions and surface-specific information  
696 (such as Zone, proximity to water and connectivity) to avoid deprioritizing key equipment surfaces.  
697 Tompkin (6) showed that the exact response to detecting contamination by industry can differ by  
698 the facility, the food being handled, and equipment in question, but corrective actions typically will  
699 take into account various factors (such as existing cleaning and sanitation frequency, material  
700 composition for cleanability and harborage risks and other relevant practices). In both models some  
701 of the most effective corrective actions similarly required situation-specific interpretation and  
702 analysis to be implemented; this methodology is reinforced by the number of corrective actions built  
703 with site-specific considerations detailed by Tompkin (6).

704 Several corrective action scenarios evaluated here (i.e., AI\_02/AI\_02C1/ AI\_02C2 and  
705 AI\_03/AI\_03C1/AI\_03C2) required information on the agent-specific contamination probability. This  
706 demonstrates a distinct advantage in ABM usage in providing supplementary *in silico* data to an  
707 EMP, as the data, such as a surface's predicted risk of being contaminated, can allow a facility to  
708 investigate and focus efforts on locations of higher predicted contamination risk. This may be of  
709 particular use in the event of a data scarcity in an EMP, which may be caused by insufficient  
710 coverage that cannot reliably detect *Listeria spp.* presence throughout a facility (41). Though a lack  
711 of data can be alleviated with intensive validation sampling (42), an ABM may be a highly practical  
712 tool in directing efforts more quickly and efficiently, ultimately saving time and money (12).  
713 Furthermore, given the practical impossibility of a facility to assess multiple corrective actions in  
714 reality, an ABM can evaluate various corrective action scenarios and advise which are more likely to  
715 be useful.

716

## 717 **Limiting *Listeria* Transmission Across Equipment Surfaces**

718 Lastly, the third corrective action strategy, modifying existing surface transmission pathways, was  
719 functionally the most unique, as it wholly depended on the facility's preexisting layout and  
720 equipment structure. While it is relatively straightforward to take a single piece of equipment in  
721 isolation and determine potential risks during production, the interaction effects between multiple  
722 surfaces may be more difficult to assess. Good Manufacturing Practices (GMPs) (43) generally  
723 require compartmentalization within a facility to limit pathogen transmission (typically referred to as  
724 hygienic zoning) but employing an ABM can allow for a more extensive review of such control  
725 strategies in a relatively rapid timeframe. Though some transmission pathways cannot be removed  
726 or modified due to their critical functions (i.e., major belts or the flume system), there are several  
727 auxiliary equipment surfaces that may present a greater risk than initially considered due to elevated  
728 connectivity between them. These transmission pathways may allow for cross-contamination  
729 outside of typical FCS-to-FCS routes.



730 Transmission pathways were identified in both models, that were not critical to packinghouse  
731 operations but still allowed for *Listeria* movement between areas; subsequently they were modified  
732 to restrict transmission. The layout of Facility A's production line was predominantly designed as a  
733 one-way flow, but it featured a highly interconnected drainage system spanning multiple areas. In  
734 corrective action AI\_04, the drain system in Facility A was modified to restrict drain cross-  
735 contamination, which was particularly effective in areas needing more drainage (i.e., wet areas). In  
736 practice, redesigning a facility's entire drainage system with anti-backflow valves would take time  
737 and effort to complete, and may be more practical when constructing a new packinghouse facility.  
738 Implementing AI\_04 in Facility B was more straightforward, as the activity of two forklift agents  
739 operating between two interior areas allowed for frequent *Listeria* cross-contamination between the  
740 Reject and Loading areas. Limiting a single forklift to each area severed any direct contamination  
741 routes, leaving *Listeria* only able to follow the production line to reach the Reject area. This  
742 compartmentalization directly limited the spread of *Listeria* into other areas and demonstrates that  
743 a relatively simple corrective action can have widespread impact. In practice, reducing surface  
744 interconnectivity, may also be implemented through employee training or redesign of equipment to  
745 reduce or prevent cross-contamination (44).

## 746 **Combined Corrective Actions Have Facility-Wide Impact on** 747 ***Listeria* Harborage**

748 As stated previously, a major advantage of an ABM is the ability to generate predictions specific to  
749 individual equipment surfaces and for specific simulated corrective actions, or their combinations,  
750 and subsequently direct efforts in more focused course. For both models, a useful metric of  
751 measuring the performance of a corrective action was investigating its efficacy and comparing  
752 change in the *Listeria* contamination prevalence in wet and dry areas. The three combined corrective  
753 action scenarios (CI\_01-CI\_03) were selected from individual corrective action types that showed the  
754 highest *Listeria* contamination prevalence reductions in either area: reducing the *Listeria* prevalence  
755 on incoming raw produce, cleaning and sanitation schedule restructuring and transmission pathway

756 modification. Of these options, a 50% reduction in *Listeria* prevalence on raw produce was chosen as  
757 a more plausible outcome than complete elimination of contamination on incoming raw produce,  
758 and each facility had its own best-performing respective cleaning and sanitation restructuring option  
759 chosen. These combined corrective actions could then be simulated and further analyzed  
760 themselves to determine the performance of using multiple corrective actions simultaneously. While  
761 this is largely similar to previous scenarios, combining corrective actions is an already suggested  
762 general strategy (45) and has the benefit of relying on multiple layers of defense. The selection and  
763 evaluation of which specific corrective actions to combine however, can be more systematically  
764 done with the additional performance data provided by an ABM's simulations.

765

## 766 **Limitations and Future Directions**

767 It should be noted that a fundamental limitation facing both models was the relatively small amount  
768 of historical data available (including complete absence of historical data for Zone 1 agents), limiting  
769 the extent of validation. It is also possible that low historical prevalence in certain areas in the facility  
770 may make it more difficult to detect meaningful levels of improvement, given an already low  
771 baseline to begin with. Additionally, both models were simulated on a virtual timescale of two  
772 weeks, making for relatively short-term observations (though at the same time addressing the  
773 industry needs for decision support tools for short-term planning). Various interventions may have  
774 far more noticeable consequences to their facilities if observed for a longer period, which should be  
775 subject of a future investigation. Furthermore, there was insufficient data available on individual  
776 agent attributes with respect to their composition or materials and how this may affect cleaning and  
777 sanitation operations, requiring agents to be treated uniformly in this regard. Currently the model  
778 can support this to a limited degree by setting agents to be cleanable or uncleanable. However, this  
779 model system can support the addition of information such as composition/materials and its impact  
780 on cleaning and sanitation once acquired during future modeling applications. A related cleaning  
781 limitation involved a lack of information on how likely agents were to undergo successful cleaning or

782 cleaning & sanitization; both of which were set at the assumed value of 0.99. Sensitivity analysis and  
783 testing lower values (i.e.,  $\gamma=0.95$  and  $\delta=0.85$ ) resulted in no meaningful change in prevalence of  
784 contaminated agents or concentration on contaminated agents. It should be noted however, that  
785 the two-week duration of this model may be too short for these values to be particularly impactful.  
786 Thus, testing the effect of the probability of successful cleaning over longer simulation runs should  
787 be a subject of a future investigation to determine whether this knowledge gap should be prioritized  
788 for research. An additional limitation due to insufficient data was that incoming crates in both  
789 facilities were treated as independent from each other, rather than simulate the arrival of clusters of  
790 crates containing contaminated produce. Again, this issue may be overcome in future models with  
791 collection of more extensive data to integrate. Due to a lack of postharvest contamination data on  
792 produce, the amount of *Listeria* introduced to the model on contaminated produce was calculated  
793 using data from Chen et al., 2016 (15) which evaluated stone fruits involved in an outbreak of  
794 listeriosis. We acknowledge that values from outbreaks may be higher than what would be expected  
795 outside of outbreak situations. Lastly, both models use a non-specific virtual strain of *Listeria* spp.,  
796 but we acknowledge that different strains of *L. monocytogenes* may have differences in properties,  
797 which could be included in future modelling efforts as well.

798 Future models should also include economic factors to assess the most appropriate interventions or  
799 combinations of interventions that should be implemented in a given facility. While the first reaction  
800 may be to implement as many separate corrections as possible for overlapping protection, each  
801 extra layer will incur additional costs (46). Instead, being able to identify potentially more cost-  
802 effective actions, such as employee training to reduce cross contamination (47) instead of  
803 equipment replacement, would allow for better decision-making that optimizes resource allocation.  
804 Furthermore, incorporating economic factors could allow for the model to estimate the overall cost  
805 to a facility of having to operate with more systemic issues, such as layout and drainage methods  
806 (48). A key takeaway that is applicable to any type of packinghouse or food processing facility  
807 attempting to combat ongoing *Listeria* contamination is that each facility should be treated uniquely

808 and addressed with specifically designed corrective actions that have highest potential effectiveness  
809 (49). Models such as those developed here could aid design of the facility specific corrective actions.  
810 An additional direction for future development may include the use of ABMs in testing measures  
811 already implemented within a facility under hypothetical situations of an increased contamination  
812 risk. While the scenarios demonstrated here were to trial corrective actions, similar techniques could  
813 be used to test the impact of increased *Listeria* contamination (e.g., in incoming material) on facility  
814 and finished product contamination under the currently implemented procedures in a facility. This  
815 would expand the scope that these models can be applied to, allowing them to be used in both a  
816 diagnostic capacity for solving existing contamination issues, and to assist in pre-emptively assessing  
817 how well a facility would be able to reduce *Listeria* contamination risks in the event of a system  
818 failure.

819

## 820 **Conclusions**

821 Once established within a packinghouse, *Listeria* spp. has proven to be difficult to control, and  
822 decision support tools such as the ABM reported may be valuable in not only quantifying how  
823 contamination may move through a facility, but in finding effective options for combating it. With  
824 Facilities A and B, we have illustrated that ABMs can serve as highly adaptable tools in the field of  
825 food safety through their ability to replicate the unique components of individual produce  
826 packinghouses. From our ABM scenarios, targeting *Listeria* that is introduced through the primary  
827 contamination route (in this case contaminated incoming raw produce) was the most effective  
828 method in prevalence reduction, and may be generalizable to different facilities as its  
829 implementation does not depend on a facility's specific layout. However, assessing the effectiveness  
830 of this strategy relies on contamination data that currently are rarely available. Therefore, it may be  
831 more practical to focus on designing in-house corrective actions, such as increasing the frequency at  
832 which select surfaces are sanitized and employing measures to limit contamination spread between

833 equipment surfaces, that account for facility-wide conditions and patterns. An element of particular  
834 note in this regard is the local presence of water within an area, as it has shown to affect *Listeria*  
835 growth and the performance of corrective actions within the specific area. The *in silico* data  
836 generated by ABMs has also shown to be useful for designing and evaluating additional corrective  
837 action scenarios. Combining contamination and corrective action results from an ABM with relevant  
838 economics data would further aid in determining the overall feasibility of implementing corrective  
839 actions specifically to individual facilities.

840

## 841 **Acknowledgments**

842 We would like to thank the personnel representing two packinghouses for their time and providing access to  
843 their facilities.

844

## 845 **References**

- 846 1. Chen Y. *Listeria monocytogenes*. In: Lampel KA, Al-Khaldi S, Cahill SM, editors. *Bad Bug Book*  
847 *Handbook of Foodborne Pathogenic Microorganisms and Natural Toxins* [Internet]. 2nd ed.  
848 FDA; 2017 [cited 2021 Jan 26]. p. 1–5. Available from:  
849 <https://www.fda.gov/media/83271/download>
- 850 2. Carpentier B, Cerf O. Review — Persistence of *Listeria monocytogenes* in food industry  
851 equipment and premises. *Int J Food Microbiol* [Internet]. 2011;145(1):1–8. Available from:  
852 <http://www.sciencedirect.com/science/article/pii/S0168160511000122>
- 853 3. WHO. *Listeriosis* [Internet]. 2018 [cited 2021 Jan 26]. p. 1–5. Available from:  
854 <https://www.who.int/news-room/fact-sheets/detail/listeriosis>
- 855 4. FDA. Get the Facts about *Listeria* | FDA [Internet]. Food and Drug Administration. 2020 [cited  
856 2021 Jan 26]. p. 1–5. Available from: [https://www.fda.gov/animal-veterinary/animal-health-](https://www.fda.gov/animal-veterinary/animal-health-literacy/get-facts-about-listeria)  
857 [literacy/get-facts-about-listeria](https://www.fda.gov/animal-veterinary/animal-health-literacy/get-facts-about-listeria)
- 858 5. Ferreira V, Wiedmann M, Teixeira P, Stasiewicz MJ. *Listeria monocytogenes* Persistence in  
859 Food-Associated Environments: Epidemiology, Strain Characteristics, and Implications for  
860 Public Health. *J Food Prot* [Internet]. 2014 Jan 1;77(1):150–70. Available from:  
861 <https://doi.org/10.4315/0362-028X.JFP-13-150>
- 862 6. Tompkin RB. Control of *Listeria monocytogenes* in the Food-Processing Environment  
863 [Internet]. Vol. 65, *Journal of Food Protection*. 2002. p. 709–25. Available from:  
864 <https://doi.org/10.4315/0362-028X-65.4.709>
- 865 7. Marriott NG, Schilling MW, Gravani RB. Food Contamination Sources. In: *Principles of Food*  
866 *Sanitation* [Internet]. Cham: Springer International Publishing; 2018. p. 83–91. Available from:  
867 [https://doi.org/10.1007/978-3-319-67166-6\\_5](https://doi.org/10.1007/978-3-319-67166-6_5)
- 868 8. Zoellner C, Jennings R, Wiedmann M, Ivanek R. EnABLE: An agent-based model to understand  
869 *Listeria* dynamics in food processing facilities. *Sci Rep* [Internet]. 2019;9(1):495. Available  
870 from: <https://doi.org/10.1038/s41598-018-36654-z>
- 871 9. Wilensky U. *Netlogo* [Internet]. Evanston, IL: Center for Connected Learning and Computer-  
872 Based Modeling, Northwestern University; 1999. Available from:  
873 <https://ccl.northwestern.edu/netlogo/>
- 874 10. Food and Drug Administration. Control of *Listeria monocytogenes* in Ready-To-Eat Foods:  
875 Guidance for Industry Draft Guidance [Internet]. 2017 [cited 2020 Mar 10]. Available from:  
876 [https://www.fda.gov/files/food/published/Draft-Guidance-for-Industry--Control-of-Listeria-](https://www.fda.gov/files/food/published/Draft-Guidance-for-Industry--Control-of-Listeria-monocytogenes-in-Ready-To-Eat-Foods-%28PDF%29.pdf)  
877 [monocytogenes-in-Ready-To-Eat-Foods-%28PDF%29.pdf](https://www.fda.gov/files/food/published/Draft-Guidance-for-Industry--Control-of-Listeria-monocytogenes-in-Ready-To-Eat-Foods-%28PDF%29.pdf)
- 878 11. Yan W, Forsyth DA. Learning the Behavior of Users in a Public Space through Video Tracking.  
879 In: 2005 Seventh IEEE Workshops on Applications of Computer Vision (WACV/MOTION'05) -  
880 Volume 1. 2005. p. 370–7.
- 881 12. Sullivan GB, Zoellner C, Wiedmann M, Ivanek R. In Silico Models for Design and Optimization  
882 of Science-Based *Listeria* Environmental Monitoring Programs in Fresh-Cut Produce Facilities.  
883 *Appl Environ Microbiol* [Internet]. 2021 Sep 14;87(21):e00799-21. Available from:  
884 <https://doi.org/10.1128/AEM.00799-21>
- 885 13. Russell RE, Katz RA, Richgels KLD, Walsh DP, Grant EHC. A Framework for Modeling Emerging  
886 Diseases to Inform Management. *Emerg Infect Dis* [Internet]. 2017 Jan;23(1):1–6. Available  
887 from: <https://pubmed.ncbi.nlm.nih.gov/27983501>

- 888 14. FDA/FSIS. Interagency Risk Assessment: *Listeria monocytogenes* in Retail Delicatessens  
889 [Internet]. 2013. Available from: <https://www.fda.gov/media/87042/download>
- 890 15. Chen Y, Burall LS, Luo Y, Timme R, Melka D, Muruvanda T, et al. *Listeria monocytogenes* in  
891 stone fruits linked to a multistate outbreak: Enumeration of cells and whole-genome  
892 sequencing. *Appl Environ Microbiol*. 2016;82(24):7030–40.
- 893 16. Hoelzer K, Pouillot R, Gallagher D, Silverman MB, Kause J, Dennis S. Estimation of *Listeria*  
894 *monocytogenes* transfer coefficients and efficacy of bacterial removal through cleaning and  
895 sanitation. *Int J Food Microbiol* [Internet]. 2012 Jul 2 [cited 2020 Mar 23];157(2):267–77.  
896 Available from:  
897 <https://www.sciencedirect.com/science/article/abs/pii/S016816051200267X?via%3Dihub>
- 898 17. Ziegler M, Rüegg S, Stephan R, Guldimann C. Growth potential of *Listeria monocytogenes* in  
899 six different RTE fruit products: impact of food matrix, storage temperature and shelf life. *Ital*  
900 *J food Saf* [Internet]. 2018 Oct 8;7(3):7581. Available from:  
901 <https://pubmed.ncbi.nlm.nih.gov/30538961>
- 902 18. Chambers MK, Ford MR, White DM, Barnes DL, Schiewer S. Transport of fecal bacteria by  
903 boots and vehicle tires in a rural Alaskan community. *J Environ Manage* [Internet]. 2009 Feb 1  
904 [cited 2020 Mar 23];90(2):961–6. Available from:  
905 <https://www.sciencedirect.com/science/article/pii/S0301479708000728?via%3Dihub>
- 906 19. BERRANG ME, FRANK JF. Generation of Airborne *Listeria innocua* from Model Floor Drains†. *J*  
907 *Food Prot* [Internet]. 2012 Jul 1;75(7):1328–31. Available from:  
908 <https://doi.org/10.4315/0362-028X.JFP-12-021>
- 909 20. R Core Team. R: A Language and Environment for Statistical Computing [Internet]. R  
910 Foundation for Statistical Computing; 2021. Available from: <https://www.r-project.org/>
- 911 21. Dowle M, Srinivasan A, Gorecki J, Chirico M, Stetsenko P, Short T, et al. Package “data.table”:  
912 Extension of “data.frame” [Internet]. CRAN. 2020 [cited 2021 Feb 5]. p. 1–126. Available  
913 from: <https://cran.r-project.org/web/packages/data.table/data.table.pdf>
- 914 22. Sullivan G, Wiedmann M. Detection and Prevalence of *Listeria* in U.S. Produce Packinghouses  
915 and Fresh-Cut Facilities. *J Food Prot* [Internet]. 2020 Sep 22;83(10):1656–66. Available from:  
916 <https://doi.org/10.4315/JFP-20-094>
- 917 23. Hitchins AD, Jinneman K, Chen Y. BAM Chapter 10: Detection of *Listeria monocytogenes* in  
918 Foods and Environmental Samples, and Enumeration of *Listeria monocytogenes* in Foods |  
919 FDA. In: *Bacteriological Analytical Manual* [Internet]. 2017 [cited 2021 Jan 25]. p. 99–103.  
920 Available from: [https://www.fda.gov/food/laboratory-methods-food/bam-chapter-10-](https://www.fda.gov/food/laboratory-methods-food/bam-chapter-10-detection-listeria-monocytogenes-foods-and-environmental-samples-and-enumeration)  
921 [detection-listeria-monocytogenes-foods-and-environmental-samples-and-enumeration](https://www.fda.gov/food/laboratory-methods-food/bam-chapter-10-detection-listeria-monocytogenes-foods-and-environmental-samples-and-enumeration)
- 922 24. Harrell Jr FE, Dupont C, Horvath V, Levine JG, Cortens E, Xie Y, et al. Package “Hmisc”: Harrell  
923 Miscellaneous [Internet]. CRAN. 2020 [cited 2021 Feb 5]. p. 1–441. Available from:  
924 <https://cran.r-project.org/web/packages/Hmisc/Hmisc.pdf>
- 925 25. Stevenson M, Sergeant E, Nunes T, Heuer C, Marshall J, Sanchez J, et al. Package “epiR”: Tools  
926 for the Analysis of Epidemiological Data [Internet]. CRAN. 2020 [cited 2021 Jan 11]. p. 1–194.  
927 Available from: <https://cran.r-project.org/web/packages/epiR/epiR.pdf>
- 928 26. Kassambara A, Mundt F. Package “factoextra”: Extract and Visualize the Results of  
929 Multivariate Data Analyses [Internet]. CRAN. 2020 [cited 2021 Jan 11]. p. 1–84. Available  
930 from: <https://cran.r-project.org/web/packages/factoextra/factoextra.pdf>
- 931 27. Husson F, Josse J, Le S, Mazet J. Package “FactoMineR”: Multivariate Exploratory Data

- 932 Analysis and Data Mining [Internet]. CRAN. 2020 [cited 2021 Jan 11]. p. 1–100. Available  
933 from: <https://cran.r-project.org/web/packages/FactoMineR/FactoMineR.pdf>
- 934 28. Wei T, Simko V, Levy M, Xie Y, Jin Y, Zemla J. Package “corrplot” [Internet]. CRAN. 2017 [cited  
935 2021 Apr 27]. p. 1–18. Available from: [https://cran.r-](https://cran.r-project.org/web/packages/corrplot/corrplot.pdf)  
936 [project.org/web/packages/corrplot/corrplot.pdf](https://cran.r-project.org/web/packages/corrplot/corrplot.pdf)
- 937 29. MALLEY TJ V, STASIEWICZ MJ, GRÖHN YT, ROOF S, WARCHOCKI S, NIGHTINGALE K, et al.  
938 Implementation of Statistical Tools To Support Identification and Management of Persistent  
939 *Listeria monocytogenes* Contamination in Smoked Fish Processing Plants. *J Food Prot*  
940 [Internet]. 2013 May 1;76(5):796–811. Available from: [https://doi.org/10.4315/0362-](https://doi.org/10.4315/0362-028X.JFP-12-236)  
941 [028X.JFP-12-236](https://doi.org/10.4315/0362-028X.JFP-12-236)
- 942 30. Pietrysiak E, Smith S, Ganjyal GM. Food Safety Interventions to Control *Listeria*  
943 *monocytogenes* in the Fresh Apple Packing Industry: A Review. *Compr Rev Food Sci Food Saf*  
944 [Internet]. 2019 Nov 1;18(6):1705–26. Available from: [https://doi.org/10.1111/1541-](https://doi.org/10.1111/1541-4337.12496)  
945 [4337.12496](https://doi.org/10.1111/1541-4337.12496)
- 946 31. Farber JM, Coates F, Daley E. Minimum water activity requirements for the growth of *Listeria*  
947 *monocytogenes*. *Lett Appl Microbiol* [Internet]. 1992 Sep 1;15(3):103–5. Available from:  
948 <https://doi.org/10.1111/j.1472-765X.1992.tb00737.x>
- 949 32. Spanu C, Jordan K. *Listeria monocytogenes* environmental sampling program in ready-to-eat  
950 processing facilities: A practical approach. *Compr Rev Food Sci Food Saf* [Internet]. 2020 Nov  
951 1;19(6):2843–61. Available from: <https://doi.org/10.1111/1541-4337.12619>
- 952 33. Angelo KM, Conrad AR, Saupe A, Dragoo H, West N, Sorenson A, et al. Multistate outbreak of  
953 *Listeria monocytogenes* infections linked to whole apples used in commercially produced,  
954 prepackaged caramel apples: United States, 2014–2015. *Epidemiol Infect* [Internet]. 2017 Apr  
955 9 [cited 2021 Jan 23];145(5):848–56. Available from:  
956 [https://www.cambridge.org/core/product/identifier/S0950268816003083/type/journal\\_](https://www.cambridge.org/core/product/identifier/S0950268816003083/type/journal_article)  
957 [article](https://www.cambridge.org/core/product/identifier/S0950268816003083/type/journal_article)
- 958 34. CDC. Multistate Outbreak of Listeriosis Associated with Jensen Farms Cantaloupe --- United  
959 States, August--September 2011 [Internet]. Centers for Disease Control and Prevention. 2011  
960 [cited 2021 Jan 22]. p. 1–3. Available from:  
961 <https://www.cdc.gov/mmwr/preview/mmwrhtml/mm6039a5.htm>
- 962 35. Berrang ME, Meinersmann RJ, Frank JF, Ladely SR. Colonization of a Newly Constructed  
963 Commercial Chicken Further Processing Plant with *Listeria monocytogenes*†. *J Food Prot*  
964 [Internet]. 2010 Feb 1;73(2):286–91. Available from: [https://doi.org/10.4315/0362-028X-](https://doi.org/10.4315/0362-028X-73.2.286)  
965 [73.2.286](https://doi.org/10.4315/0362-028X-73.2.286)
- 966 36. Rørvik LM. *Listeria monocytogenes* in the smoked salmon industry. *Int J Food Microbiol*  
967 [Internet]. 2000;62(3):183–90. Available from:  
968 <http://www.sciencedirect.com/science/article/pii/S0168160500003342>
- 969 37. Estrada EM, Hamilton AM, Sullivan GB, Wiedmann M, Critzer FJ, Strawn LK. Prevalence,  
970 Persistence, and Diversity of *Listeria monocytogenes* and *Listeria* Species in Produce  
971 Packinghouses in Three U.S. States. *J Food Prot* [Internet]. 2020 Jan 21;83(2):277–86.  
972 Available from: <https://doi.org/10.4315/0362-028X.JFP-19-411>
- 973 38. Fox EM, Wall PG, Fanning S. Control of *Listeria* species food safety at a poultry food  
974 production facility. *Food Microbiol* [Internet]. 2015;51:81–6. Available from:  
975 <https://www.sciencedirect.com/science/article/pii/S074000201500088X>



- 976 39. Esteban JI, Oporto B, Aduriz G, Juste RA, Hurtado A. A survey of food-borne pathogens in  
977 free-range poultry farms. *Int J Food Microbiol* [Internet]. 2008;123(1):177–82. Available from:  
978 <https://www.sciencedirect.com/science/article/pii/S0168160507007210>
- 979 40. Allende A, Monaghan J. Irrigation Water Quality for Leafy Crops: A Perspective of Risks and  
980 Potential Solutions. *Int J Environ Res Public Health* [Internet]. 2015 Jul 3;12(7):7457–77.  
981 Available from: <https://pubmed.ncbi.nlm.nih.gov/26151764>
- 982 41. Strawn LK, Gröhn YT, Warchocki S, Worobo RW, Bihn EA, Wiedmann M. Risk Factors  
983 Associated with Salmonella and Listeria monocytogenes Contamination of Produce Fields.  
984 *Appl Environ Microbiol* [Internet]. 2013 Dec 15;79(24):7618 LP – 7627. Available from:  
985 <http://aem.asm.org/content/79/24/7618.abstract>
- 986 42. Muhterem-Uyar M, Dalmasso M, Bolocan AS, Hernandez M, Kapetanakou AE, Kuchta T, et al.  
987 Environmental sampling for Listeria monocytogenes control in food processing facilities  
988 reveals three contamination scenarios. *Food Control* [Internet]. 2015;51:94–107. Available  
989 from: <https://www.sciencedirect.com/science/article/pii/S0956713514006240>
- 990 43. Beno SM, Stasiewicz MJ, Andrus AD, Ralyea RD, Kent DJ, Martin NH, et al. Development and  
991 Validation of Pathogen Environmental Monitoring Programs for Small Cheese Processing  
992 Facilities. *J Food Prot* [Internet]. 2016 Dec 1;79(12):2095–106. Available from:  
993 <https://doi.org/10.4315/0362-028X.JFP-16-241>
- 994 44. FDA. Good Manufacturing Practices for the 21st Century for Food Processing (2004 Study)  
995 Section 1: Current Food Good Manufacturing Practices | FDA [Internet]. Food and Drug  
996 Administration. 2017 [cited 2021 Apr 27]. Available from: [https://www.fda.gov/food/current-](https://www.fda.gov/food/current-good-manufacturing-practices-cgmps-food-and-dietary-supplements/good-manufacturing-practices-21st-century-food-processing-2004-study-section-1-current-food-good)  
997 [good-manufacturing-practices-21st-century-food-processing-2004-study-section-1-current-food-good](https://www.fda.gov/food/current-good-manufacturing-practices-cgmps-food-and-dietary-supplements/good-manufacturing-practices-21st-century-food-processing-2004-study-section-1-current-food-good)  
998
- 999 45. Bolocan AS, Oniciuc EA, Alvarez-Ordóñez A, Wagner M, Rychli K, Jordan K, et al. Putative  
1000 Cross-Contamination Routes of Listeria monocytogenes in a Meat Processing Facility in  
1001 Romania. *J Food Prot* [Internet]. 2015 Sep 1;78(9):1664–74. Available from:  
1002 <https://doi.org/10.4315/0362-028X.JFP-14-539>
- 1003 46. ILSI RESEARCH FOUNDATION/RISK SCIENCE INSTITUTE EPONLMINF. Achieving Continuous  
1004 Improvement in Reductions in Foodborne Listeriosis—A Risk-Based Approach. *J Food Prot*  
1005 [Internet]. 2005 Sep 1;68(9):1932–94. Available from: [https://doi.org/10.4315/0362-028X-](https://doi.org/10.4315/0362-028X-68.9.1932)  
1006 [68.9.1932](https://doi.org/10.4315/0362-028X-68.9.1932)
- 1007 47. Meireles A, Giaouris E, Simões M. Alternative disinfection methods to chlorine for use in the  
1008 fresh-cut industry. *Food Res Int* [Internet]. 2016;82:71–85. Available from:  
1009 <http://www.sciencedirect.com/science/article/pii/S0963996916300126>
- 1010 48. Lappi VR, Thimothe J, Walker J, Bell J, Gall K, Moody MW, et al. Impact of Intervention  
1011 Strategies on Listeria Contamination Patterns in Crawfish Processing Plants: A Longitudinal  
1012 Study†. *J Food Prot* [Internet]. 2004 Jun 1;67(6):1163–9. Available from:  
1013 <https://doi.org/10.4315/0362-028X-67.6.1163>
- 1014 49. Nyarko E, Kniel KE, Zhou B, Millner PD, Luo Y, Handy ET, et al. Listeria monocytogenes  
1015 persistence and transfer to cantaloupes in the packing environment is affected by surface  
1016 type and cleanliness. *Food Control* [Internet]. 2018;85:177–85. Available from:  
1017 <http://www.sciencedirect.com/science/article/pii/S095671351730467X>
- 1018 50. Lappi VR, Thimothe J, Nightingale KK, Gall K, Scott VN, Wiedmann M. Longitudinal Studies on  
1019 Listeria in Smoked Fish Plants: Impact of Intervention Strategies on Contamination Patterns. *J*  
1020 *Food Prot* [Internet]. 2004 Nov 1;67(11):2500–14. Available from:

1021 <https://doi.org/10.4315/0362-028X-67.11.2500>

1022

1023 **Supporting information**

1024 **S1 File. Supporting Information File – S1.docx.**

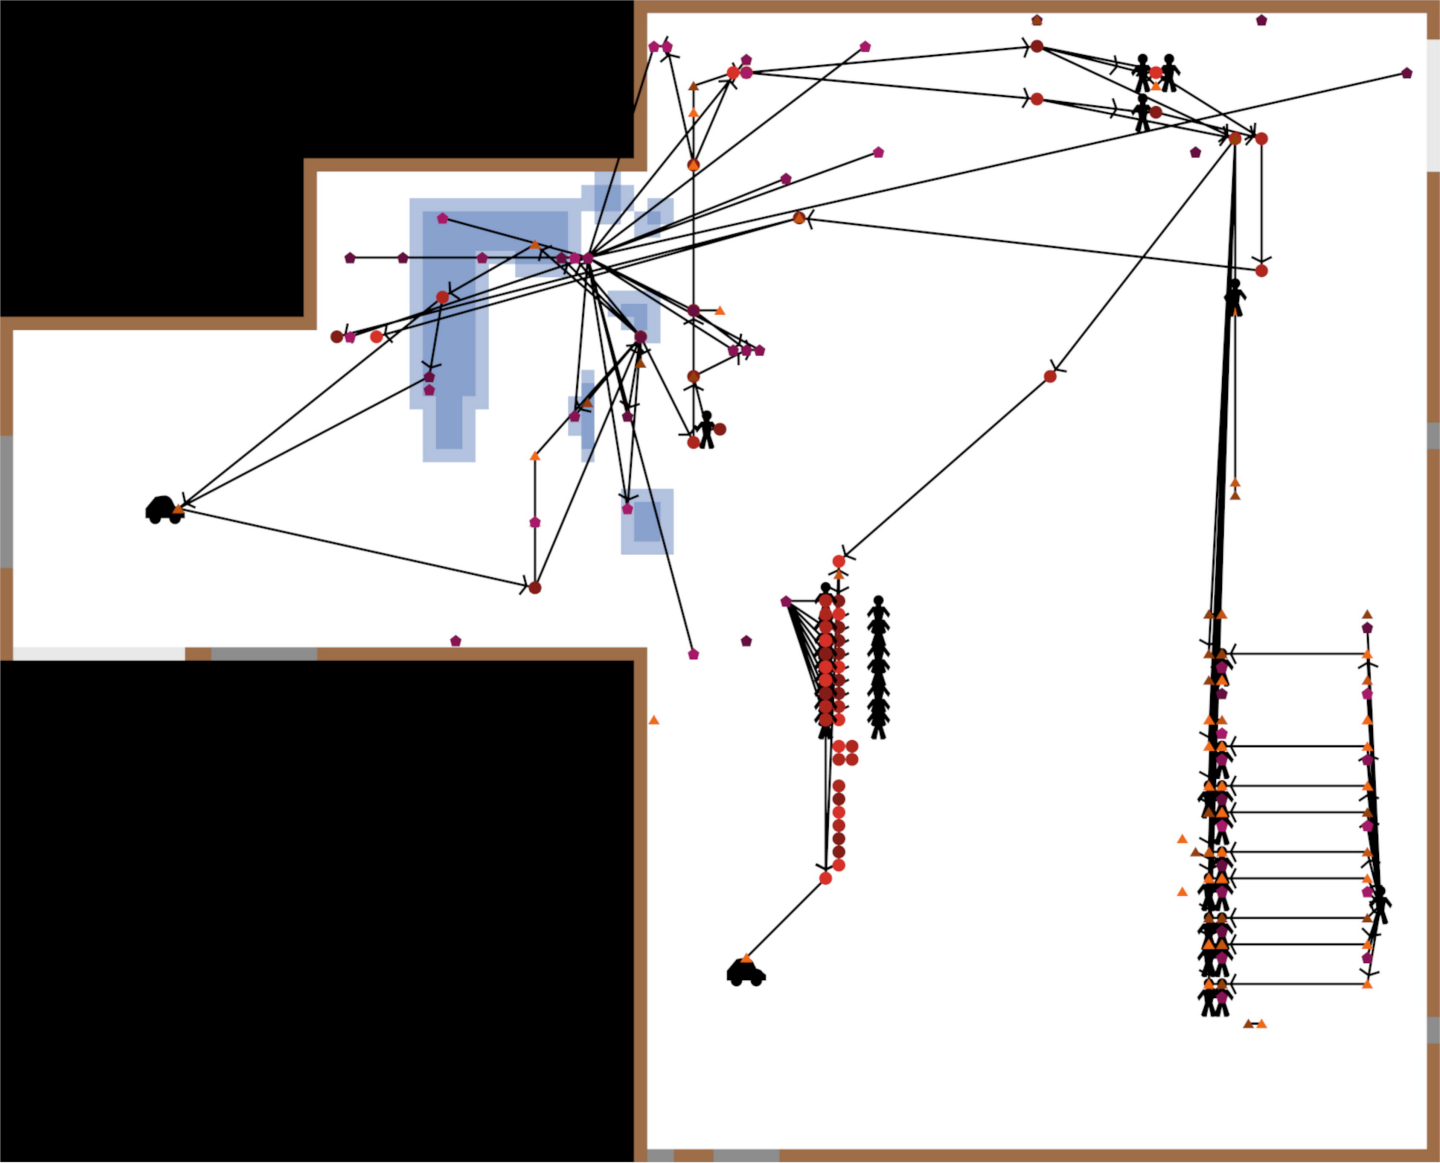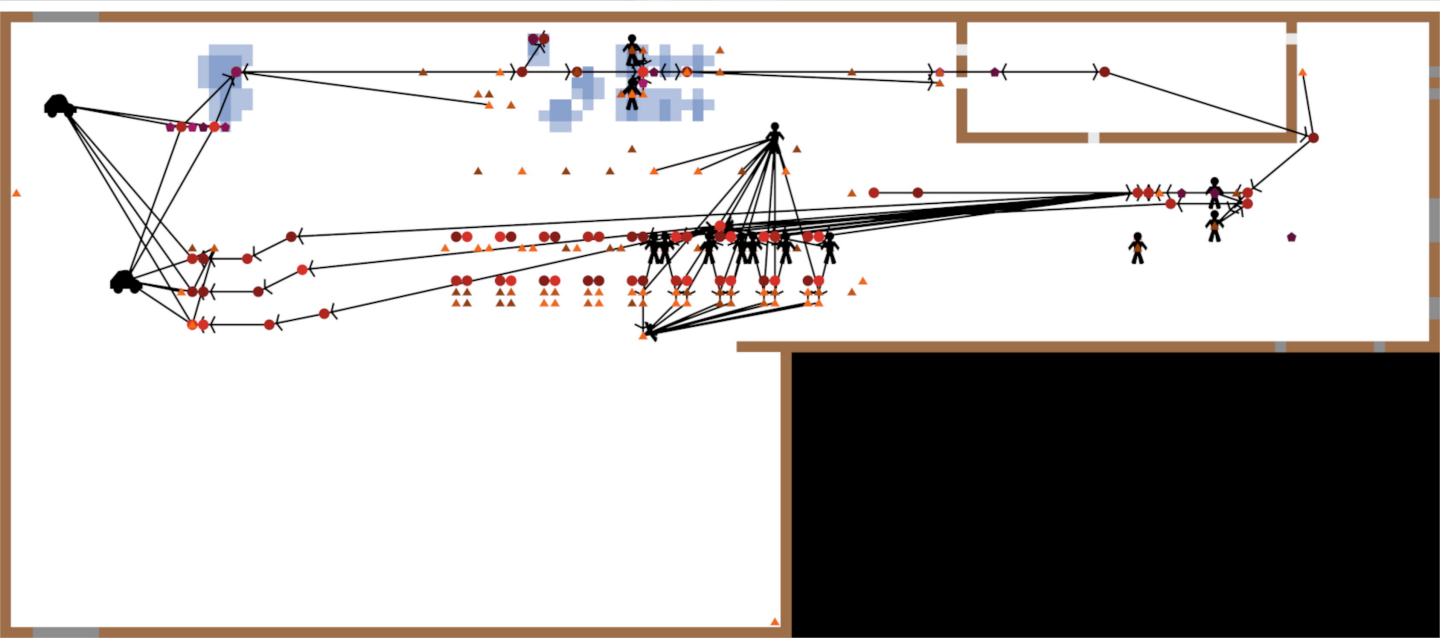

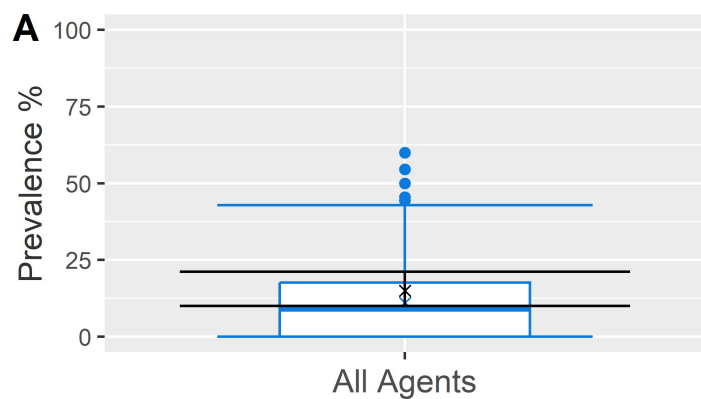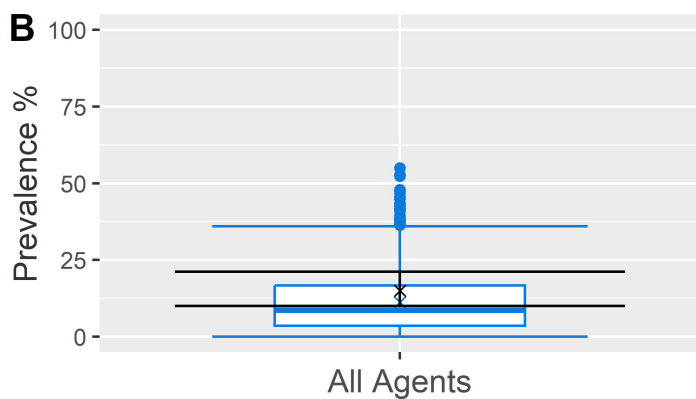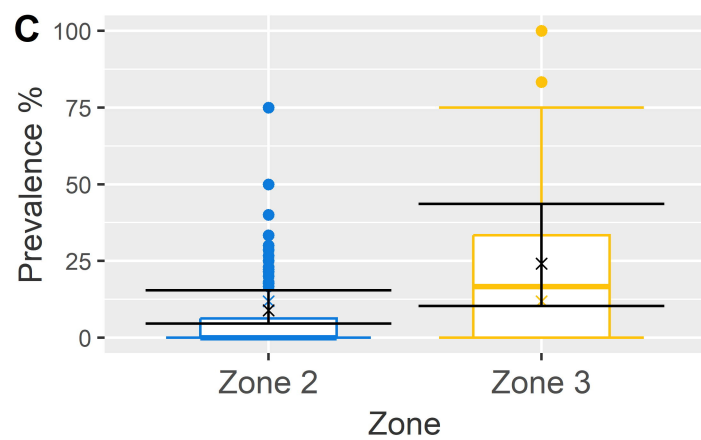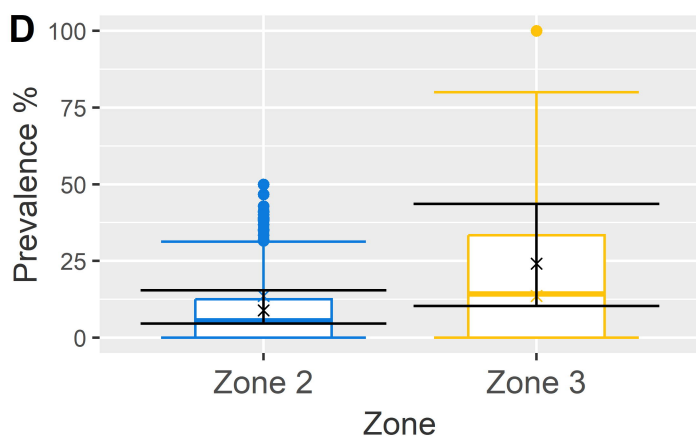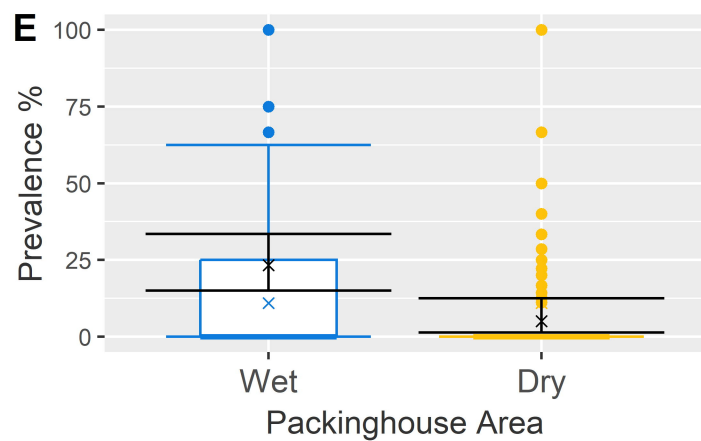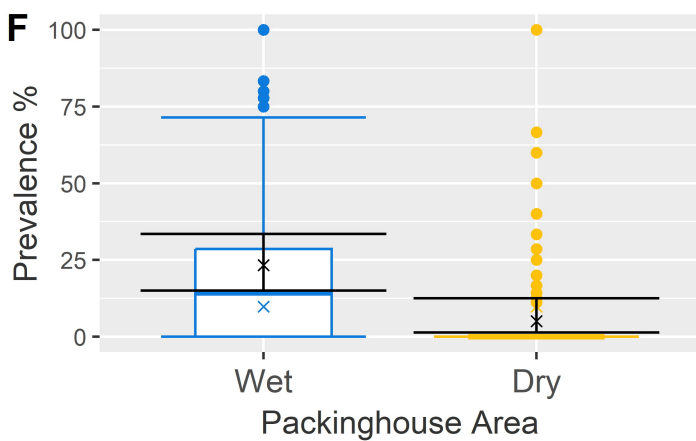

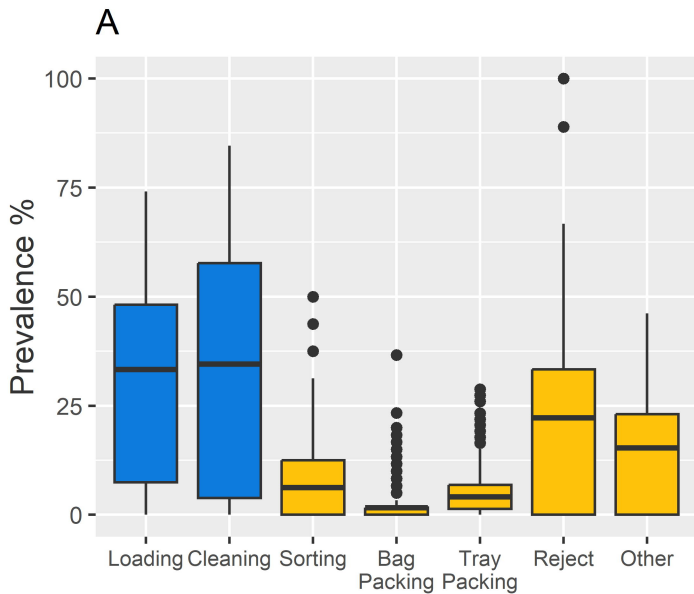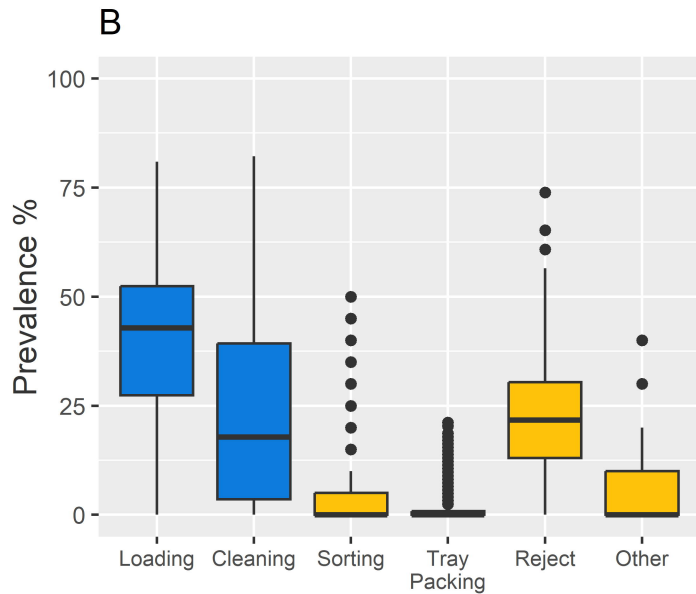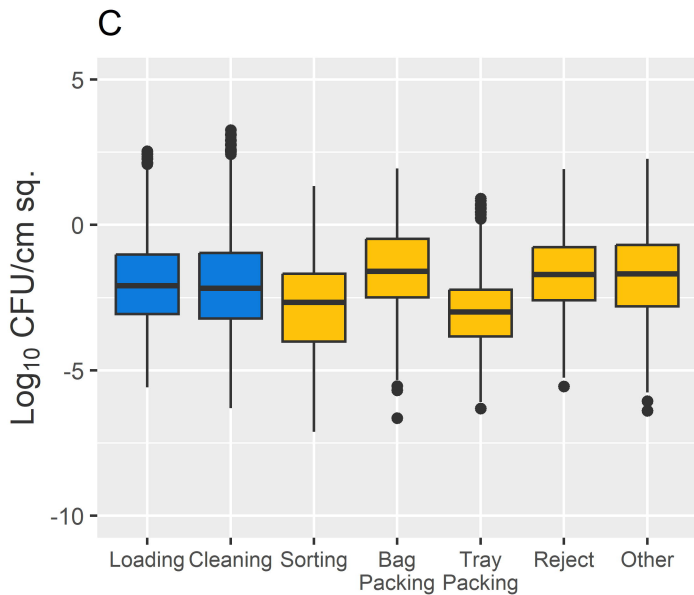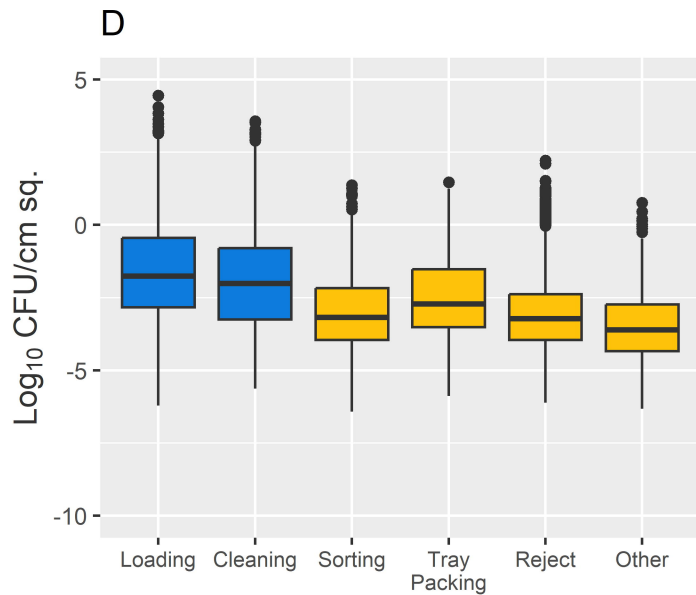

Area Water Group ■ Dry ■ Wet

**A**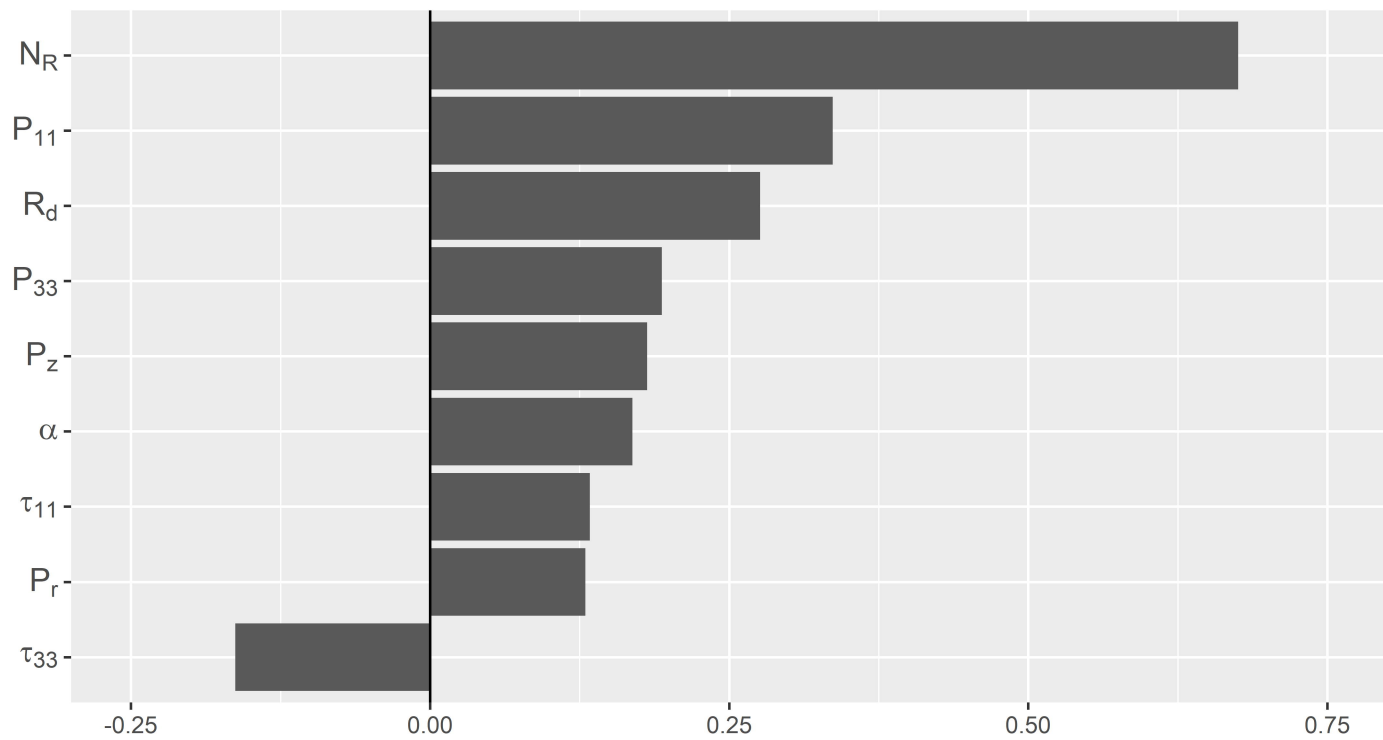**B**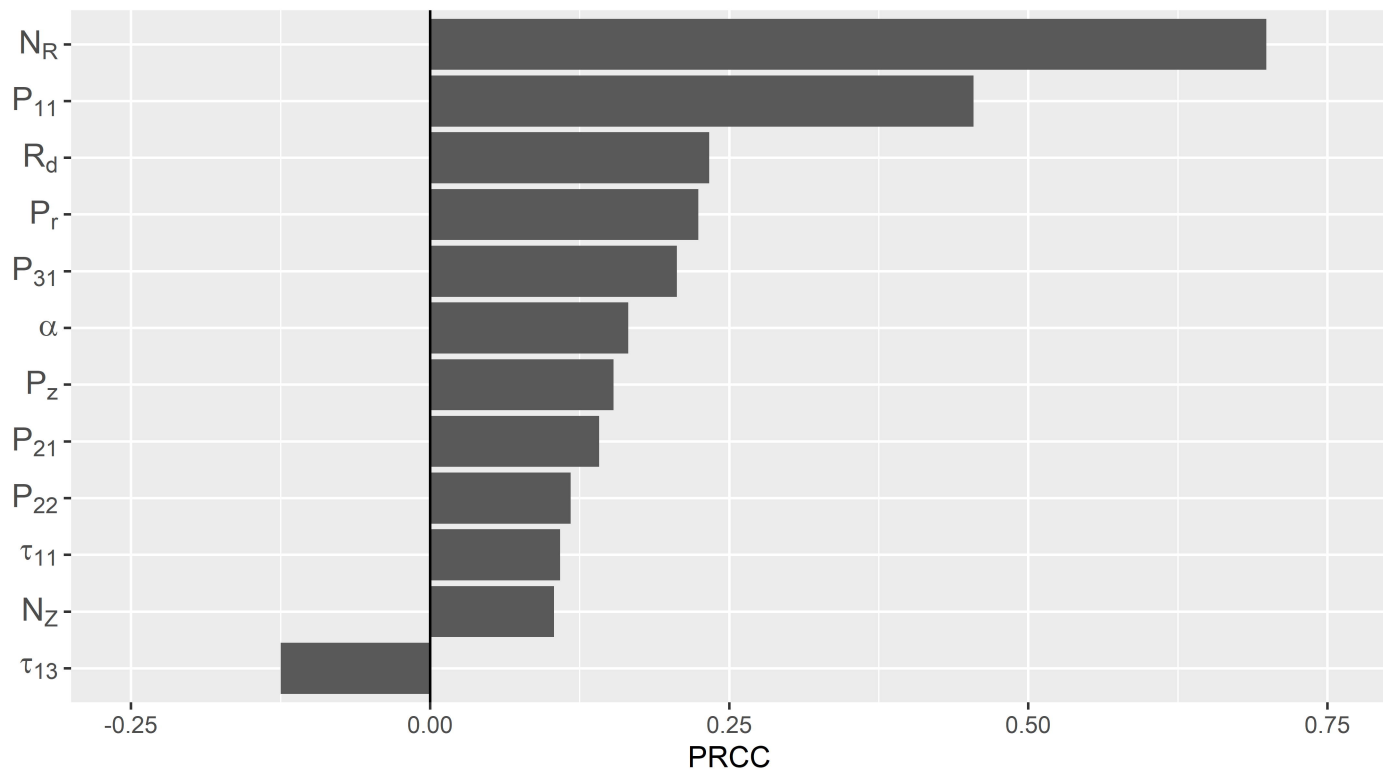

**A**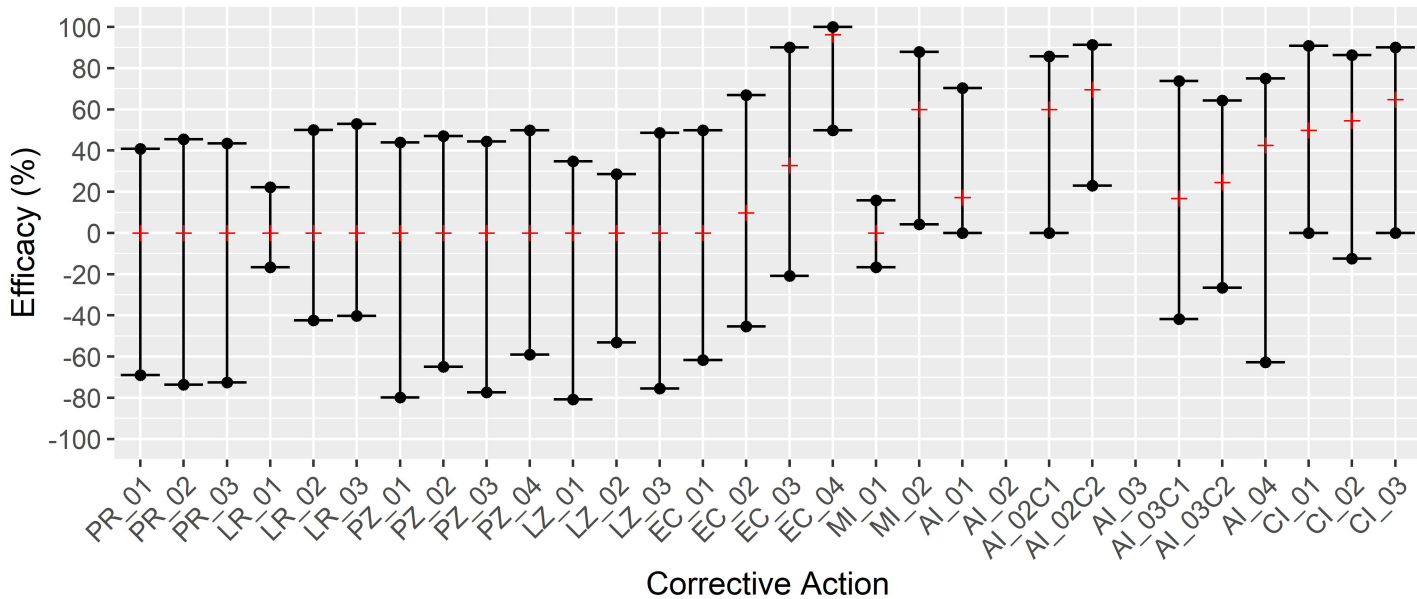**B**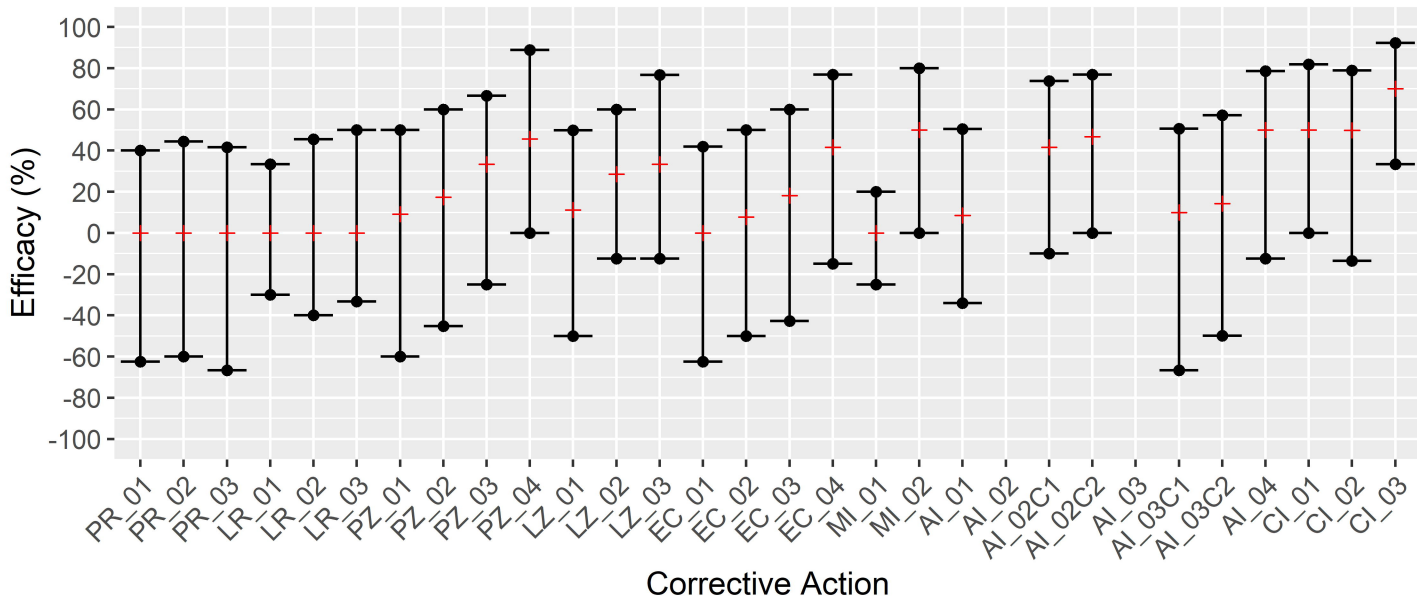

**A**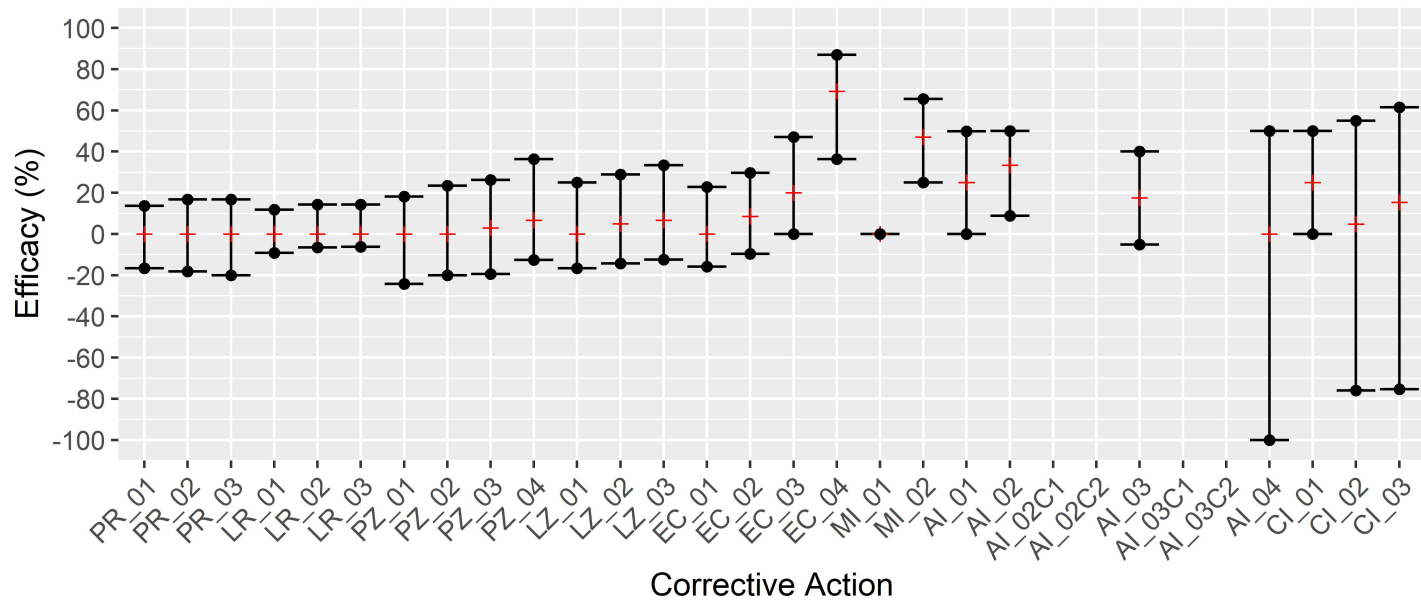**B**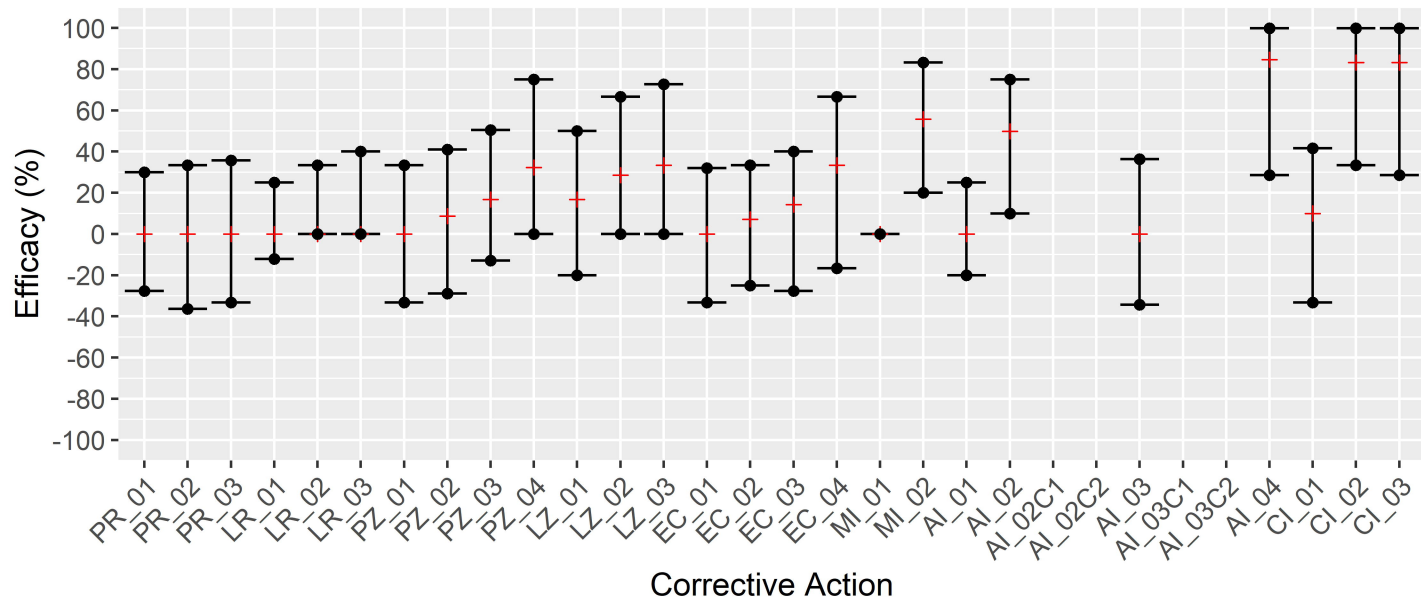

Source: https://www.medrxiv.org/content/medrxiv/early/2022/02/19/2022.02.16.22271004.full.pdf
